# Supplementary material
Source: PubMed Central journal article supplement (PMC8121519)
Supplement: jci-131-146832-s167.pdf [file jci-131-146832-s167.pdf]

## **SUPPLEMENTARY MATERIAL**

### **Atractylenolide I enhances responsiveness to immune checkpoint blockade therapy by activating tumor antigen presentation**

Hanchen Xu, Kevin Van der Jeught, Zhuolong Zhou, Lu Zhang, Tao Yu, Yifan Sun, Yujing Li, Changlin Wan, Ka Man So, Degang Liu, Michael Frieden, Yuanzhang Fang, Amber L Mosley Xiaoming He, Xinna Zhang, George E. Sandusky, Yunlong Liu, Samy Meroueh, Chi Zhang, Aruna B Wijeratne, Cheng Huang, Guang Ji, Xiongbin Lu

- Supplementary Methods and References
- Supplementary Figure 1-11
- Supplementary Table 1-5

## **SUPPLEMENTARY METHODS**

### **Reagents**

The following antibodies were used: Immunoprecipitation antibody for pulling down PSMD4 is proteasome 19S S5A/ASF antibody (ab20239, Abcam). Western blotting antibodies including S5a/PSMD4 antibody (3336S, Cell Signaling), PSMD7 antibody (3336S, Cell Signaling), GFP(FL) Rabbit polyclonal IgG (sc-8334, Santa Cruz) and anti- $\beta$ -actin (sc-8432, Santa Cruz); immunofluorescence staining antibodies including anti-human HLA-A,B,C (ab70328, Abcam) and anti-EGFR (#4267, Cell Signaling); immunohistochemical staining antibodies including anti-CD8a (98941S, Cell Signaling), anti-F4/80 (70076S, Cell Signaling) and anti-CD4 (25229S, Cell Signaling); flow cytometry antibodies including H-2Kb-FITC (Clone AF6-88.5; Biolegend), H-2Kb-PerCPCy5.5 (Clone AF6-88.5; Biolegend), H-2Kb bound to SIINFEKL-APC (clone 25-D1.16, Biolegend), CD45-BV605 (Clone 30-F11; Biolegend), TCR $\beta$ -PE/Cy7 (Clone H57-597; Biolegend), CD11b-eFluor450 (Clone M1/70; eBioscience), CD4-AF700 (Clone GK1.5; Biolegend), CD8-APC/Cy7 (Clone 53-6.7; Biolegend), 7-AAD (Biolegend), H-2k<sup>d</sup>-APC (Clone SF1-1.1; Biolegend), Isotype Mouse IgG2a-APC (Clone MOPC-173, Biolegend) and HLA-A,B,C-APC/Cy7 (Clone W6/32, Biolegend); BioXCell antibodies including anti-mouse PD-1 (clone RMP1-14; BE0146), anti-mouse CD4 (clone GK1.5; BE0003-1), rat IgG2a isotype control (Clone 2A3, BE0089), anti-CD20 (Clone AISB12, BE0302), anti-CD8 (Clone 53-6.72; BE0004-1), SYTOX Blue Dead Cell Stain (S34857, ThermoFisher). The dilution of the antibodies was done using the pH 7.0 dilution buffer (BioXcell). Rat IgG2a Isotype control (InVivoMab, Clone 2A3, BE0089), anti-mouse MHC Class I (H2) (InVivoMab, Clone M1/42.3.9.8, BE0077), ATT-I (Yuanye Biotechnology Co., China, B20054; CAS#73069-13-3).

### **Three-dimensional protein structure analysis**

The PyMol graphics program was used to depict the three-dimensional structures shown in Fig. 4. The Schrodinger drug discovery package was used to predict the structure of the covalent

complex between ATT-I and PSMD4. The Maestro module within Schrodinger was used to process the protein structures. Hydrogen atoms were added and the protonation state of ionizable residues assigned by pro-pKa. The structure was energy minimized. The CovDock module was used for the covalent docking of ATT-I to PSMD4.

### **PSMD4 protein expression and purification**

pGEX-6P-1 vector was used to clone the recombinant protein GST-PSMD4. Mouser PSMD4 cDNA fragment (NM\_001330692.2.) was amplified and ligated into the pGEX-6P-1 vector (Addgene). In order to get the recombinant protein, pGEX-6P-1/PSMD4 was transformed into *E. coli* BL21 (DE) (BioLab, UK). The positive clone was cultured in LB medium until OD<sub>600</sub> reached approximately 0.6 at 37 °C. Isopropyl β- d-1-thiogalactopyranoside (IPTG, Sigma) was used to induce protein expression with the final concentration of 1 mM for 5 h at 37 °C. The cells were harvested and suspended in the binding buffer (140 mM NaCl, 2.7 mM KCl, 10 mM Na<sub>2</sub>HPO<sub>4</sub>, 1.8 mM KH<sub>2</sub>PO<sub>4</sub>, pH 7.3). The cells were lysed by sonication for 30 min, and then the cell debris was removed by centrifugation at 12,000 rpm for 20 min at 4 °C. The supernatant was collected and applied to a Glutathione Sepharose 4 FF column (Sigma, USA) to purify recombinant protein according to the manufacturer's instructions. GST-tag was digested by Precision protease (Sigma, USA) to purify PSMD4 proteins without tag.

### **shRNAs and MC38 cells with stable PSMD4 knockdown**

PSMD4 shRNA #1:

5'-CCGGTTATAGAACAGGGTCACATTGCTCGAGCAATGTGACCCTGTTCTATAATTTTTG-3'

PSMD4 shRNA #2:

5'-CCGGGTGAATGTTGACATCATTAACTCGAGATTAATGATGTCAACATTCACTTTTTG-3'

PSMD7 shRNA:

5'-CCGGCCCAACTCAGTATTGGTCATTCTCGAGAATGACCAATACTGAGTTGGGTTTTTG-3'

Lentiviral PSMD4 and PSMD7 shRNA was transduced into luciferase expressing MC38-OVA cells. 48 hours after infection, the MC38 cells were cultured with the addition of 1 µg/ml puromycin and the survived cells were grown up to single colonies, from which the colonies with stable knockdown of PSMD4 or PSMD7 (expression determined by qPCR, western blotting) were selected for the *in vivo* experiment.

### **Proliferation assay**

Luciferase expressing MC38 cell line was transfected with pCDH-CMV-OVA lentivirus plasmid (Puro<sup>+</sup>) to generate single colon stably expressing OVA peptide (SIINEFKL). The OVA (pcDNA3-OVA, addgene) was constructed inhouse into the pCDH-CMV-MCS-EF1-puro plasmid (System Biosciences). Luciferase expressing MC38-OVA, MC38-OVA-PSMD4<sup>loss</sup> and MC38-OVA-PSMD4<sup>loss</sup> tumor cells were seed in 96-well microplate at 2,000 cells per well. The cells were imaged every 6 hours using the incucyte system (Essen BioScience Inc.) for 5 days and the cell confluence was analyzed by the incucyte software.

### **Co-immunoprecipitation**

Co-immunoprecipitation was performed using the immunoprecipitation kit (ab206996, Abcam). Briefly, cells scraped from 15 cm dishes were lysed in non-denaturing lysis buffer provided by the assay kit on a rotary mixer at 4°C for 30 min. After centrifugation by 10,000 g, cell lysates were incubated with the indicated antibody overnight at 4°C. The immunoprecipitates were incubated with the protein A/G-agarose beads for 1 hour at 4°C. The beads were collected and eluted in SDS buffer elution and then immunoblotted with the indicated antibodies. Antibodies used for immunoprecipitation was proteasome 19S S5A/ASF antibody (ab20239, Abcam). Antibodies used for immunoblotting were S5a/PSMD4 antibody (Dilution: 1:2,000, 3336S, Cell Signaling), PSMD7 antibody (Dilution: 1:500, 3336S, Cell Signaling), GFP(FL) Rabbit polyclonal IgG (Dilution: 1:3,000, sc-8334, Santa Cruz) and anti-β-actin (Dilution: 1:5,000, sc-8432, Santa Cruz).

## **Immunofluorescence**

In Brief, cells ( $5 \times 10^3$  per well) were seeded and cultured overnight to Millicell EZ 8-well glass slides, rinsed with PBS and fixed with 4% paraformaldehyde (PFA) for 10 min at room temperature. Fixed cells were incubated with 0.5% Triton X-100/PBS and blocked with 0.2% BSA/PBS. Cells were then incubated with primary antibody (anti-HLA-A,B,C) overnight at 4 °C followed by Alexa Fluor 488-conjugated goat anti-mouse IgG antibody (dilution 1:300) for 1 hour at room temperature. DAPI (Sigma-Aldrich) staining was performed after antibody staining. Samples were mounted with mounting medium (Sigma-Aldrich) and fluorescent images were taken using Leica TCS SP8 (upright high-speed multiphoton) confocal imaging system. Image quantification was performed using Imaris image analysis software (Bitplane). Total intensity in green channel (HLA-A,B,C staining) per image was obtained based on the “Surfaces” image segmentation and number of nuclei (corresponding to number of cells per image) was calculated based on DAPI staining using the Imaris “Spots” segmentation module. The value of average intensity per cell was then calculated by dividing the total intensity in green channel by number of nuclei to give HLA (Intensity/cell).

## **Immunohistochemistry**

The tissue samples were fixed in formalin for 24 hours and sequentially stored in 70% ethanol until the tissues were embedded in paraffin. Three micron sections were cut and processed for immunohistochemistry staining.

## **Single-cell RNA sequencing (scRNA-seq) analysis**

Single cell suspension of tumors is prepared as for the CyTOF samples. Hereafter, the single cells were stained for: CD45-BV605, TCR $\beta$ -PE/Cy7, CD11b-eF450, CD4-AF700, CD8-APC/Cy7 and 7-AAD. Viable (7-AAD negative) single cells were sorted as CD45<sup>+</sup>, CD11b<sup>-</sup>, TCR $\beta$ <sup>+</sup>. The sorted samples were immediately submitted to the core facility for sample preparation for the

scRNA sequencing. The library for downstream scRNA sequencing is constructed using 3' v2 library preparation kit following manufacturer's protocol (10X genomics). After amplification and normalization, cDNA with index barcode were loaded on and sequenced by NovaSeq 6000 (Illumina).

Sequencing data were demultiplexed and mapped to mm10 genome for the retrieval of gene expression counts matrix by utilizing Cell Ranger (10X Genomics). Downstream analysis of these matrices were conducted by Seurat (V3.1), unless indicated otherwise. Cell filtering follows two criteria for all samples: 1) detected number of RNA in a single cell should be over 500, 2) the percentage of mitochondria genes detected in a single cell should not exceed 15%. The remaining cells from each sample were merged and log-normalized. PhenoGraph in Seurat was applied to cluster cells with resolution set as 0.5. Low dimensional t-SNE visualization was computed by Rtsne package using normalized transcriptional expression profile with perplexity setting as 30. Each cell cluster is annotated by marker genes found by FindAllMarkers function in Seurat. Heatmap is then drawn with log-normalized expression level. We further looked into T-cell activation and cytotoxicity level on representative genes with dot visualization. The color code of each codes stands for the relative mean expression level from different sample, and the size of each dot represents the percentage of expressed cells within samples. To evaluate the cytotoxic level of each cell, we used the averaged expression level of six cytotoxic and CD8<sup>+</sup> T cell marker genes, namely: *Prf1*, *Ifng*, *Tnf*, *Pdcd1*, *Sla2* and *Cd8a*. Significant expression of each cytotoxic marker gene in each cell were computed by using left truncated mixture Gaussian model. CD8<sup>+</sup> effector T cells with significant cytotoxic genes expressed were defined by the CD8<sup>+</sup> effector T cells with at least three out of the six genes significantly expressed, the proportion of which was further computed.

**Mass spectrometry (MS) based cellular thermal shift assay (CETSA) to identify potential targets of ATT-I in MC38 cells using melt temperature (T<sub>m</sub>) shifts**

To screen out potential binding targets for ATT-I in a high throughput fashion, two groups of cells were compared for their protein level temperature dependent denaturation profiles using two biologically distinct replicate cell cultures for each group. Briefly, the two groups were—1) DMSO treated control MC38 cells; and 2) ATT-I (5.0  $\mu\text{M}$ ) treated MC38 cells. Sample preparation, mass spectrometry analysis, bioinformatics and data evaluation were performed in collaboration with the Proteomics Core Facility at the Indiana University School of Medicine Methods described below in brief were adaptations from previously published reports (1-5) and vendor provided protocols.

### ***Cell lysis and protein assay***

For cell lysis, a fresh solvent system (10 mL) was first prepared to include 50 mM HEPES, 200 mM NaCl, 10 mM  $\text{MgCl}_2$ , 5 mM  $\beta$ -glycerophosphate, 0.1 mM activated sodium orthovanadate, 2 mM TCEP (tris(2-carboxyethyl)phosphine hydrochloride) and 1x EDTA-free protease inhibitor (cOmplete Mini, Roche). Pelleted cells were then mobilized in this solvent buffer system (800  $\mu\text{L}$ ) contained in 1.5 mL Micro Tubes (TPX Plastic for Sonication from DiagenDE Inc.). Mobilized cells were next subjected to sonication using a Bioruptor<sup>®</sup> sonication system (DiagenDE) 30 seconds/30 seconds respective on/off cycles for 15 mins in a 4 °C cold water bath. Total protein concentration of each sample was determined using a Bradford protein assay. All lysates were then diluted to a protein concentration of 2  $\mu\text{g}/\mu\text{L}$  for the subsequent temperature treatment.

### ***Temperature treatment, supernatant “decanting”, and proteolytic digestion***

Six aliquots (50  $\mu\text{L}$ ) of each sample treated with either DMSO or compound were placed among six tubes designed for PCR workflows, and equilibrated at six temperature points—35.0; 45.3; 50.1; 55.2; 60.7; and 74.9 °C for 3 mins in a thermocycler (Mastercycler Pro, Eppendorf) system as described elsewhere (1, 3). Following heat treatment, lysates were centrifuged for 20 mins at 4 °C to pellet out insoluble protein and then to decant the soluble fraction. A 45  $\mu\text{L}$  aliquot from each heat-treated sample was subject to protein precipitation and then reconstituted in 30  $\mu\text{L}$  of 8 M Urea in Tris.HCl (pH 8.0). Samples were next subjected to reduction of Cys-Cys bonds with

5 mM TCEP, and alkylation with 10 mM chloroacetamide (CAM) to protect the reduced Cys residues. Samples were diluted to have 2 M Urea and were digested in-solution overnight using Trypsin (Promega) to derive peptides.

### ***Enrichment of peptides***

Resulting peptides were “de-salted” using Sep-Pak® Vac 1cc C18 Cartridges, 50 mg Sorbent per Cartridge, 55-105 µm Particle Size (Waters Co.) employing a vacuum manifold. Briefly, columns adapted onto the extraction manifold were first washed sequentially with (1) ACN (500 µL)-two times, (2) ACN/H<sub>2</sub>O 70/30 (v/v; 0.1% FA; 200 µL)-one time, and (3) MS-grade water (500 µL)-two times. Peptides from each “digestion” solution were then subjected to immobilization on C18 material by a gentle application of vacuum into the extraction manifold vacuum chamber to move each solution three times by collecting the “flow-through” fractions and running them again on to the same column. Next, the peptide-bound C18 columns were washed with 500 µL of MS-Grade H<sub>2</sub>O and then eluted by passing 150 µL of ACN/H<sub>2</sub>O 70/30 (v/v; 0.1% FA) three times. All elution fractions were collected into 1.5 mL Eppendorf tubes and subjected to complete dryness using a speed vacuum system.

### ***Tandem Mass Tags (TMT) based peptide labelling and fractionation***

The respective dried samples were then subjected to TMT-based labelling using sixplex kits (TMT6plex™ Isobaric Label Reagent Set, 2 x 0.8 mg). The TMT channels—TMT126, TMT127, TMT128, TMT129, TMT130, and TMT131, were employed to label peptide solutions derived from the 35.0; 45.3; 50.1; 55.2; 60.7; and 74.9 °C temperature treatments. Briefly, each dried sample (equivalent of 10 µg of protein digest) was reconstituted in 100 µL of 50 mM Triethylammonium bicarbonate (TEAB) and dry labeling reagents were dissolved in 40 µL of acetonitrile (ACN). Reconstituted peptide solutions were then mixed with 40 µL labelling reagent solution and kept at room temperature for overnight to label the peptides. Labelling reaction was next quenched by adding 8 µL of 5% hydroxylamine and keeping the reaction mixture at room temperature for more than 15 mins. Labelled peptide solutions were next mixed together and subjected to complete



dryness in a speed vacuum system. Dried labelled peptide mixtures were fractionated using reversed phase fractionation columns (8 fractions) employing vendor provided protocols (Pierce Biotechnology). The resulting 8 fractions were dried using a speed vacuum system and re-constituted in 0.1% formic acid (30  $\mu$ L) prior to nano-LC-MS/MS analysis.

### ***Nano-LC-MS/MS analysis***

Nano-LC-MS/MS analyses were performed on a Q-Exactive Plus™ mass spectrometer (Thermo Scientific) coupled to an EASY-nLC™ HPLC system (Thermo Scientific). Ten  $\mu$ L equivalent volume of the re-constituted fractions from above were loaded using 300 bar as applied maximum pressure onto an in-house prepared reversed phase column. Each reversed phase column was prepared by pulling a 100  $\mu$ m fused-silica column to carry 5  $\mu$ m tip for the nanospray using a P-2000 laser puller, and then packing the capillary with C18 reverse phase resin (particle size: 3  $\mu$ m diameter; Dr. Maisch HPLC GmbH). The peptides were eluted using a varying mobile phase (MP) gradient from 95% phase A (FA/H<sub>2</sub>O 0.1/99.9, v/v) to 24% phase B (FA/ACN 0.4/99.6, v/v) for 150 mins, from 24% phase B to 35% phase B for 25 mins and then keeping the same MP-composition for 5 more mins at 400 nL/min to ensure elution of all peptides. Nano-LC mobile phase was introduced into the mass spectrometer using a Nanospray Flex Source (Proxeon Biosystems A/S). The heated capillary temperature was kept at 275 °C and ion spray voltage was kept at 2.5 kV. During peptide elution, the mass spectrometer method was operated in positive ion mode for 180 mins, programmed to select the most intense ions from the full MS scan using a top 20 method. Additional parameters: Microscans 1; Resolution 70k; AGC target 3E6; Maximum IT 50 ms; Number of scan ranges 1; Scan range 400 to 1600 m/z; and Spectrum data type "profile", and then to perform data dependent MS/MS scans with parameters: Microscans 1; Resolution 35k; AGC target 1E5; Maximum IT 64 ms; Loop count 20; MSX count 1; Isolation window 0.7 m/z; Fixed first mass 100 m/z; NCE 38.0; and Spectrum data type "Centroid". The respective data dependent settings were set with parameters: Minimum AGC target of 1.00e3; Intensity threshold of 1.6e4; Apex trigger as "-"; Charge exclusion as "1,7,8, >8"; Multiple Charge

States as “all”; Peptide match as “preferred”; Exclude isotopes as “on”; Dynamic exclusion of 30.0 s; If idle “pick others”. The data were recorded using Thermo Xcalibur (4.1.31.9) software (Thermo Fisher)

### ***Data Analysis***

Resulting RAW files were analyzed using the MaxQuant software suite 1.6.0.16 ([www.maxquant.org](http://www.maxquant.org)). The MS/MS spectra were searched against in silico tryptic digest of *Mus musculus* proteins database (FASTA format) from the UniProt sequence database (v. May 2017). Default MaxQuant parameter settings were utilized as downloaded from [www.maxquant.org](http://www.maxquant.org), except for the following: 1) in group specific parameters tab to have “type” as “Reporter ion MS2”; “Isobaric labels” selected as “6plex TMT”; “Reporter mass tol.” as “0.003 Da”; 2) in group specific parameters—“digestion” mode as specific for trypsin with maximum 3 missed cleavages; 3) group specific parameters—“modifications” to have variable modifications acetyl (protein N-terminus); phosphor (STY) and methionine oxidation, with peptides to carry maximum number of 5 modifications per peptide; and 4) global parameters tab— to carry a minimum peptide length of 7 residues, maximum peptide mass of 4600 Da. Please note, 4 such searches were carried out separately for each of four samples. The resulting Maxquant “peptides.txt” files were then imported to Microsoft Excel™ (Version 14.07182.5000, 32-bit) and then to JMP® 12.1.0 (64bit, Microsoft Windows 7 Enterprise 64-bit, Service Pack 1, Copyright©2015 SAS Institute Inc.) for processing. Only those peptides identified with a minimum of PEP value of 0.05 were selected for further evaluation. Table S5 summarizes the number of peptides parsed through the procedure. Protein quantification values were derived by summation of quantification values of only the unique peptides (at least one for one protein). Following methodology was utilized for procedural error correction/normalization of the quantification values obtained for each protein in each experiment.

## **Procedural error correction and normalization of the protein quantification values and “melt” curves**

Since each TMT multiplexed experiment was carried out in separate sample preparations, and analyzed as separate mixtures, we assumed each “proteome” wide denaturation should be accounted for procedural errors separately. For the purpose, total “proteome quantifications” for each CETSA experiment were first derived by mathematical summation of protein quantification for each TMT experiment (Supplementary Figure 9, upper panel). Denaturation curves or the sigmoidal “melt curves” for these were then derived using the logistic 4P model available in JMP® 12.1.0 (64bit, Microsoft Windows 7 Enterprise 64-bit, Service Pack 1, Copyright©2015 SAS Institute Inc.). Supplementary Figure 9 (bottom panel) illustrates these curves and the associated  $R^2$  values and “melt temperatures,  $T_m$ -values”/inflection points resulted during the derivation. Equation 1 illustrates the logistic 4P model utilized. It is apparent minimal deviation is observed from actual from the predicted, however subtle deviations are apparent (Supplementary Figure 10). Thus, using %deviation and the equation illustrated in Equation 2, TMT-quantitative values of each protein in each sample were subjected to normalization. Using these normalized values, % protein abundance values for each protein and, for each temperature treatment was derived for each experiment. Then, sigmoidal plots were derived for each protein using the same logistic 4P model available in JMP® 12.1.0 (64bit, Microsoft Windows 7 Enterprise 64-bit, Service Pack 1,

Copyright©2015 SAS Institute Inc.). This allows correction to random errors associated with assumed protein level and total proteome sigmoidal protein denaturation.

Prediction Model: Logistic 4P

$$y = c + \frac{(d-c)}{(1+Exp(-a(T-b)))}$$

*a = Growth Rate*

*b = Inflection Point*

*c = Lower Asymptote*

*d = Upper Asymptote*

*T = Temperature*

**Equation 1. Logistic 4P model available in JMP® 12.1.0.**

$$\text{Norm (TMT Response of Protein)}_e = (\text{TMT Response of Protein})_e \times \frac{100 - (\% \text{ Difference from Actual})_e}{100}$$

*e = Experiment, e. g. C1; C2; T1 or T2*

*"% Difference from Actual" is Calculated from Total Protein Abundance Derived from Total TMT Responses for Each Channel*

**Equation 2. Normalization of TMT-Quant values of each protein in each sample.**

Supplementary Figure 10 illustrates the distribution plots of  $R^2$  values derived from all sigmoidal plots constructed and parsed through the criteria  $R^2 \geq 0.95$  and  $35 \text{ }^\circ\text{C} \leq T_m \leq 90 \text{ }^\circ\text{C}$ . These distributions of  $R^2$  values signified the quality of generated sigmoidal plots for the proteins isolated with applied criteria inferring the data could be used for further evaluation/processing. Nevertheless, using these parsed protein melt temperature determinations, proteins that are common in all four "CETSA samples" were next isolated, and average  $T_m$  values;  $\Delta(T_m)\{ T-C \}$  values and the associated p-values (t-test with parameters, two-tailed distribution and two-sample unequal variance) for each common protein were calculated.

Subsequent construction of distribution plot of  $\Delta(T_m)\{ T-C \}$  values; and "Volcano Plot" of  $\Delta(T_m)\{ T-C \}$  values vs  $-\log_{10} p(\text{t-test})$  values (Supplementary Figure 11), were then used to screen out

proteins with statistically significant positive  $T_m$  shifts due to compound treatment. It was assumed, stringent criteria,  $p\text{-value (t-test)} \leq 0.05$ ; and  $\Delta(T_m)\{T-C\} \geq (\bar{x} + 2\sigma) ^\circ\text{C} = +6.174 ^\circ\text{C}$ , would screen out/narrow down more biologically relevant group of proteins that were stabilized due to protein association.

## SUPPLEMENTARY REFERENCES

1. Peck Justice SA, Qi G, Wijeratne HRS, Victorino JF, Simpson ER, Wijeratne AB, et al. Temperature sensitive Mutant Proteome Profiling: a novel tool for the characterization of the global impact of missense mutations on the proteome. *bioRxiv*. 2019:2019.12.30.891267.
2. Savitski MM, Reinhard FBM, Franken H, Werner T, Savitski MF, Eberhard D, et al. Tracking cancer drugs in living cells by thermal profiling of the proteome. *Science (New York, NY)*. 2014;346(6205):1255784.
3. Jafari R, Almqvist H, Axelsson H, Ignatushchenko M, Lundbäck T, Nordlund P, et al. The cellular thermal shift assay for evaluating drug target interactions in cells. *Nature Protocols*. 2014;9(9):2100-22.
4. Mosley AL, Florens L, Wen Z, and Washburn MP. A label free quantitative proteomic analysis of the *Saccharomyces cerevisiae* nucleus. *J Proteomics*. 2009;72(1):110-20.
5. Mosley AL, Sardi ME, Pattenden SG, Workman JL, Florens L, and Washburn MP. Highly Reproducible Label Free Quantitative Proteomic Analysis of RNA Polymerase Complexes. *Molecular & Cellular Proteomics*. 2011;10(2):M110.000687.

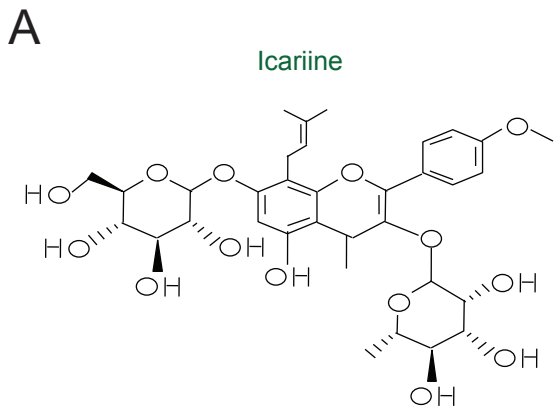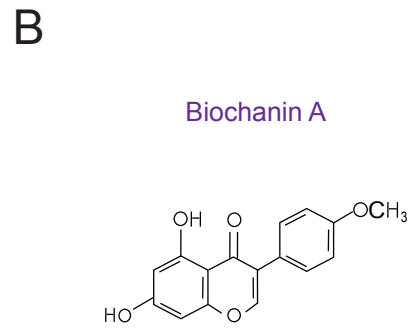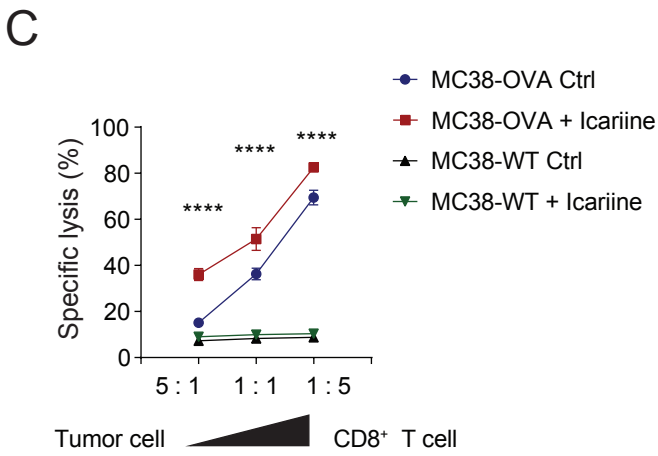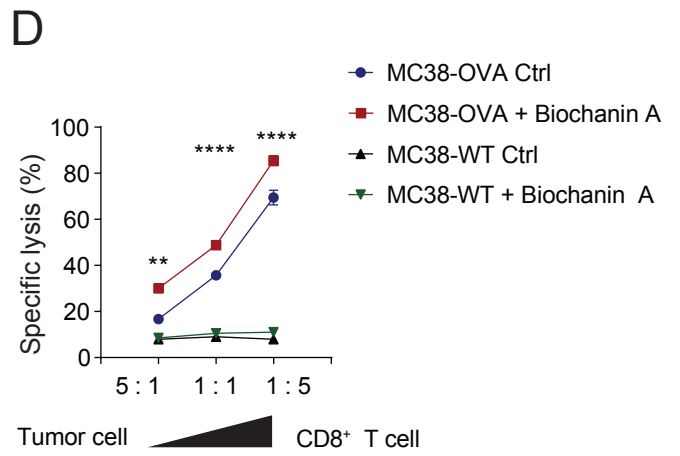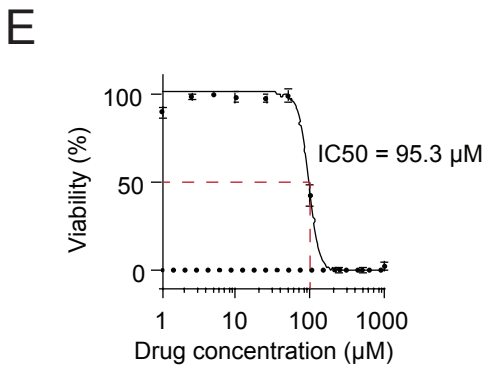

**Figure S1. Small-molecule natural compounds enhance the tumor-cell killing efficiency of CD8<sup>+</sup> T cells.** (A, B) Chemical structure of Icariine (A) and Biochanin A (B). (C,D) The effect of Icariine (C) or Biochanin A (D) treatment on the CD8<sup>+</sup> T-cell killing of MC38-OVA cells was measured under different ratios of tumor cells vs T cells as indicated. Data are presented as mean  $\pm$  SD of three independent experiments. Statistical analyses were conducted using two-way ANOVA test. Statistical analyses were conducted using two-way ANOVA test. \*\*,  $p < 0.01$ ; \*\*\*\* $p < 0.0001$ . (E) Determination for the IC<sub>50</sub> of ATT-I on MC38 cells. MC38 cells were seeded with 2000 cells per well in 96-well plate. ATT-I with different drug doses (1, 2.5, 5, 10, 25, 50, 50, 100, 250, 500 and 1000  $\mu$ M) was used to treat the cells for 3 days (n=3). WST-1 cell proliferation assay kit (Takara) was used to detect the cytotoxicity of ATT-I on cells.

A

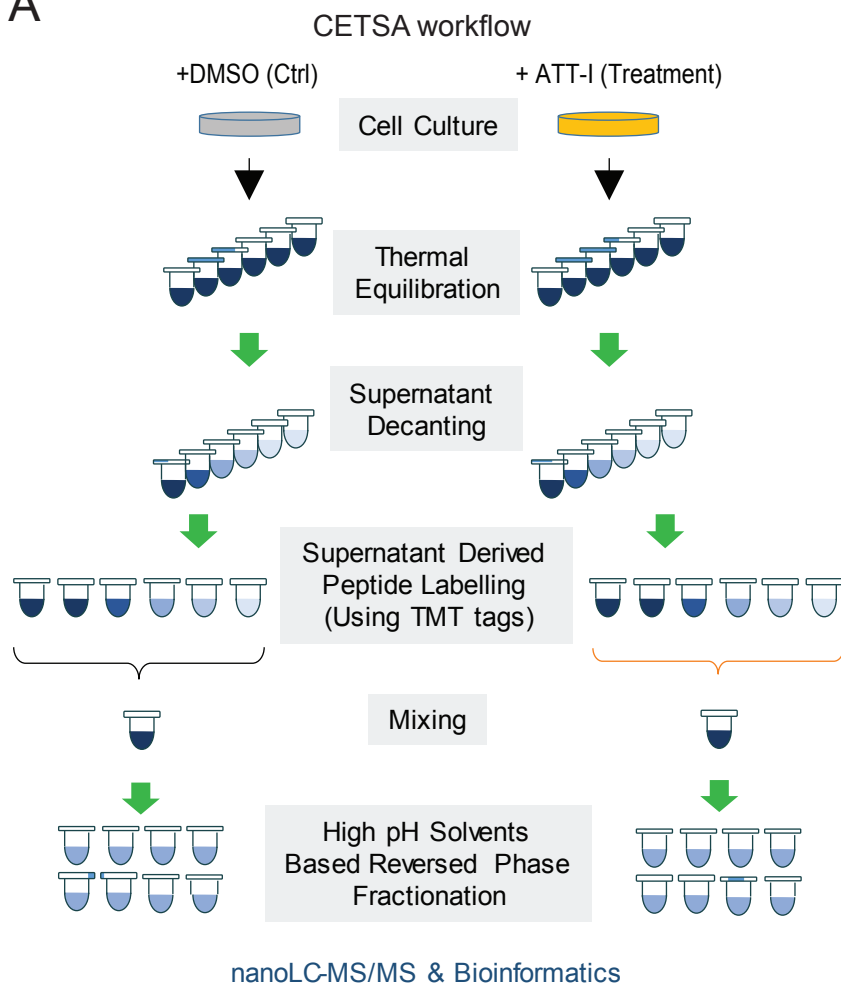

B

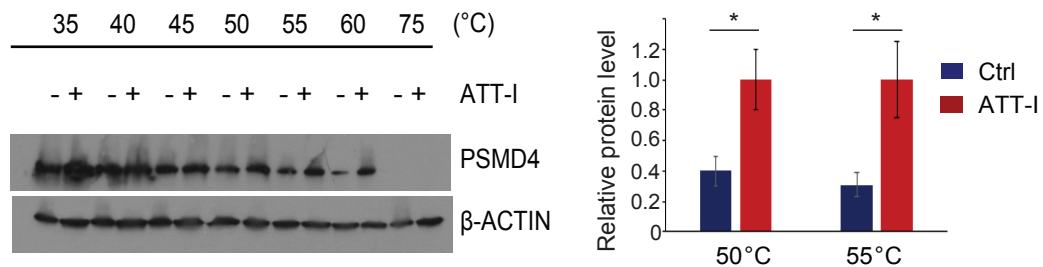

C

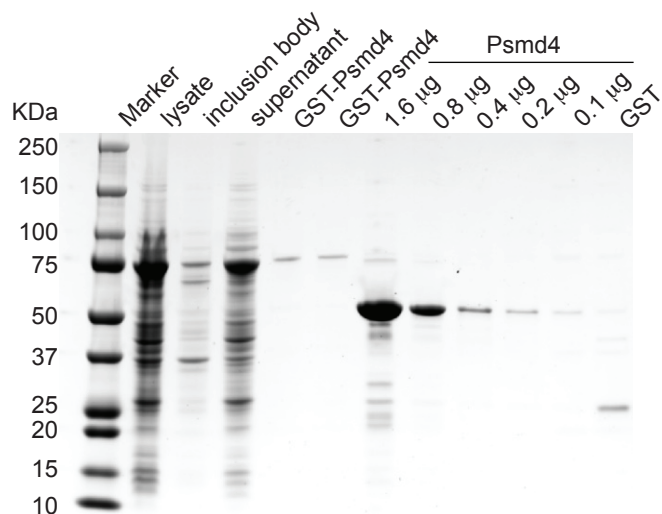

D

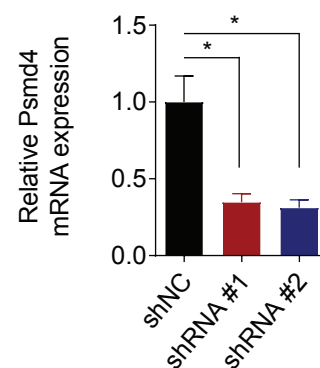



**Figure S2. PSMD4 was identified as a molecular target of ATT-I by cellular thermal shift assay (CETSA).** (A) Experimental design of CETSA. Four biologically distinct cell cultures were prepared and two were treated with DMSO (Control) and two were treated with ATT-I (Treatment). Following lysis of each cell pellet, resulting protein solutions were divided into six identical aliquots (50  $\mu$ L) and equilibrated at six temperature points—35.0; 45.3; 50.1; 55.2; 60.7; and 74.9  $^{\circ}$ C for 3 minutes as described in the Methods. Resulting denatured proteins of each tube were next pelleted out and the supernatant fractions were sequentially subjected to the following procedures: proteolytic digestion (trypsin/Lys-C based), peptide labelling with different isobaric tags (TMT: Tandem Mass Tags), mixing, and high-pH solvents based reversed phase fractionation. All the fractions were analyzed using nanoLC-MS/MS as described in the Methods. All resulted files were analyzed using the MaxQuant software suite 1.6.0.16. to identify and quantify protein abundance values and JMP<sup>®</sup> Pro 14.0.0 (64 bit) to generate sigmoidal protein melt curves and subsequent data analyses to screen out potential targets of ATT-I as described in the Methods. (B) Representative immunoblots of PSMD4 in the HCT116 cell lysates with or without ATT-I treatment were shown on the left panel. Quantitative data are presented as mean  $\pm$  SD of 3 parallel experiments. Unpaired 2-tailed t test was used for statistical analysis. (C) GST-PSMD4 fusion proteins were bacterially expressed, purified and processed for producing PSMD4 proteins. (D) Knockdown efficiency of two PSMD4 shRNAs was measured by quantitative PCR of reverse transcribed products of PSMD4 mRNA in MC38 cells. Non-target shRNA (shNC) was used as control. Data are presented as mean  $\pm$  SD of three independent experiments. Statistical analyses were conducted using one-way ANOVA test. \*,  $p < 0.05$ .

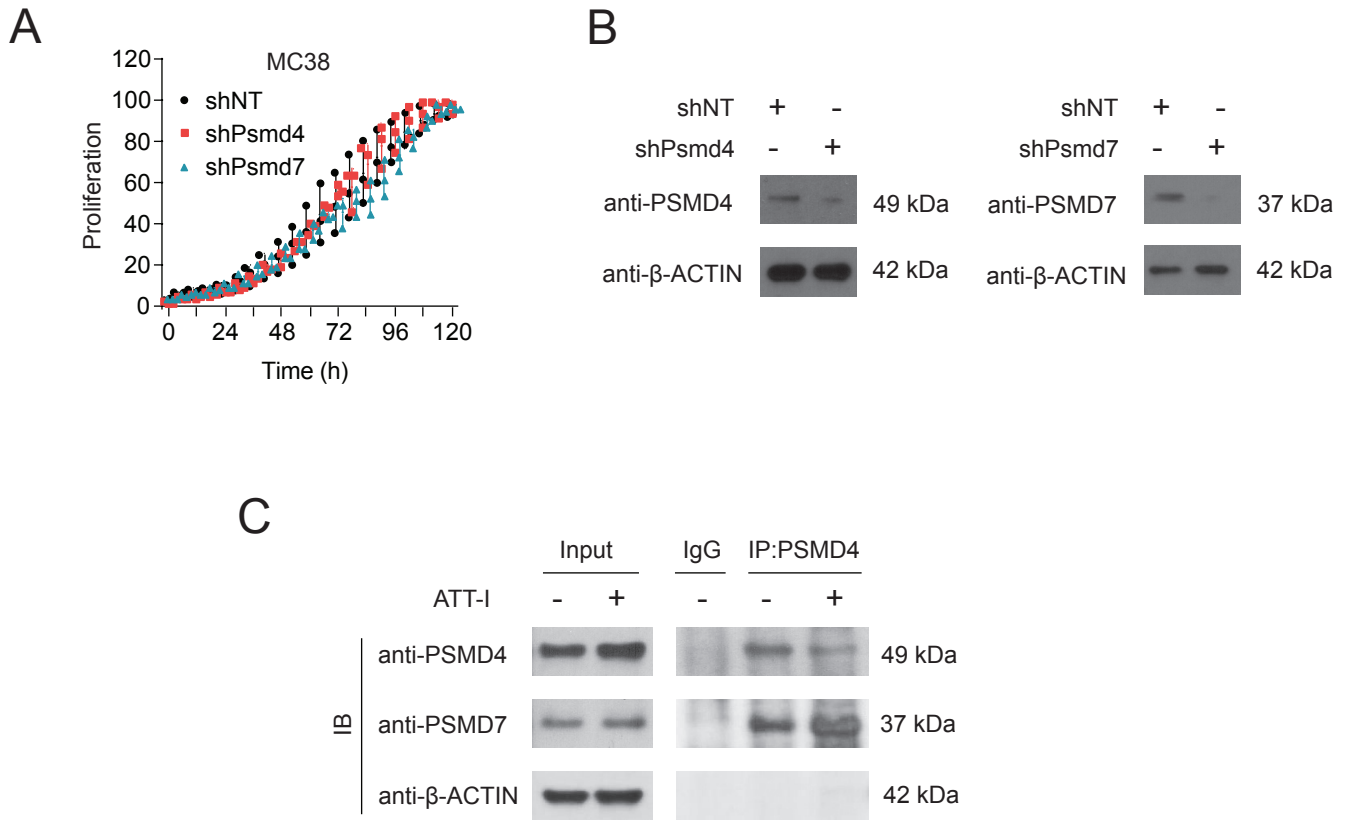

**Figure S3. Validation of shPsm4 and shPsm7 cell lines as well as immunoblots.**

(A) Incucyte cell proliferation analysis for mouse MC38-OVA cells with shNT control, shPsm4 and shPsm7 knockdown (KD). No significant differences in cell proliferation were observed among the three cell lines (n=3). Statistical analyses were conducted using two-way ANOVA test. (B) Western blot showing shPsm4 and shPsm7 knockdown in MC38-OVA cells. (C) PSMD4 is binding with PSMD7 in 19S regulatory complexes, forming 26S immunoproteasomes. PSMD4 and PSMD7 were co-immunoprecipitated by immunoprecipitation (IP) and following immunoblotting analysis (IB). HCT116 cell lysate of 5% volume used for IP was loaded as input. GFP IgG was used as a negative control. The results showed that ATT-I enhanced or stabilized the binding between PSMD4 and PSMD7.

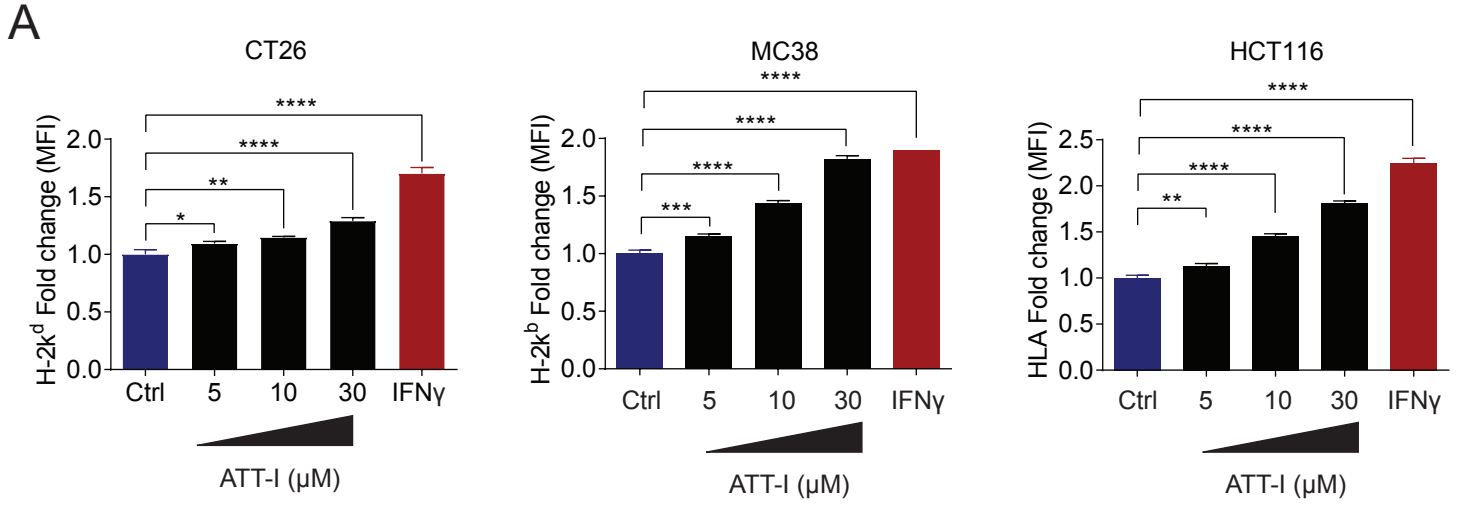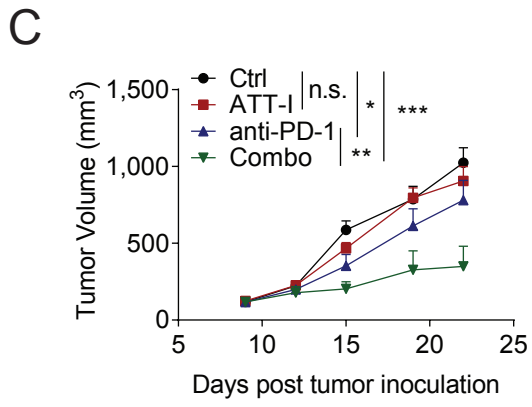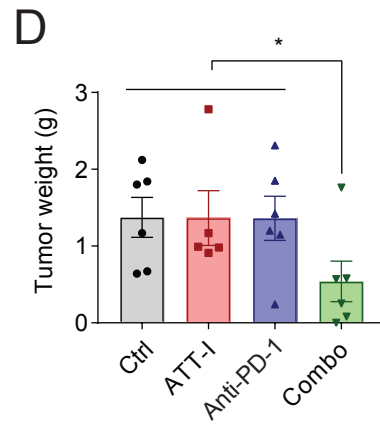

**Figure S4. ATT-I treatment enhances tumor antigen presentation and the efficiency of immune checkpoint blockade therapy.** (A) The level of H-2k<sup>d</sup> on mouse CT26 and MC38 cells and the level of HLA on HCT116 cells after ATT-I treatment were measured by flow cytometry. Quantitative data are presented as mean  $\pm$  SD of 3 parallel experiments (n=3). Statistical analyses were conducted using one-way ANOVA test. (C, D), Effects of the ATT-I (50 mg/kg, daily) and PD-1 (200  $\mu$ g/mouse, 3 times/ week, 5 injections in total) treatments on tumor growth (C) and tumor weight (D) of CT26-derived tumors in the subcutaneous BALB/c mouse model. Error bars represent SEM (n=6) and statistical analyses were conducted using two-way ANOVA test. \*,  $p < 0.05$ ; \*\*,  $p < 0.01$ ; \*\*\*,  $p < 0.005$ ; \*\*\*\*,  $p < 0.001$ , *n.s.*, not significant.

A

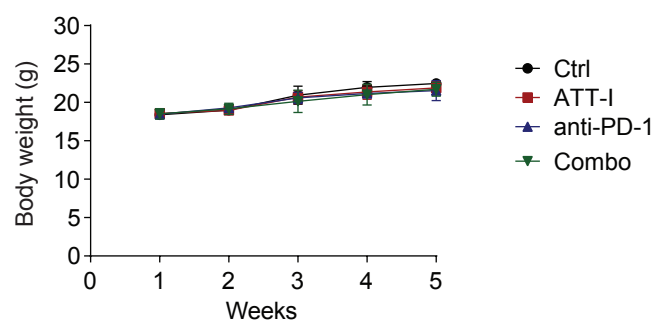

B

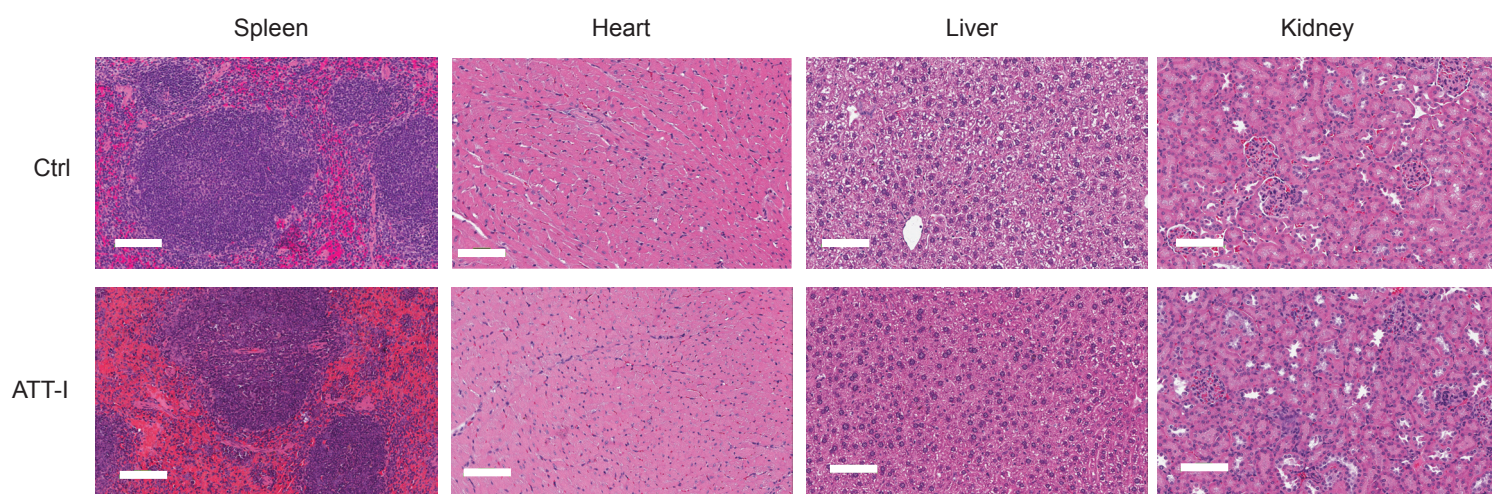

**Figure S5. No evident systemic toxicity of the ATT-I treatment was observed on the treated C57BL/6 mice.** (A) Body weight of mice with various treatments (n=4 in each group) showing no significant difference between the different treatments. The treatment scheme is identical to that in Fig. 3D. (B) Representative H&E-stained slices of major organs in mice treated with vehicle control or ATT-I (50 mg/kg, daily) on day 35. The experiments were repeated three times independently. Scale bar: 100  $\mu$ m.

A

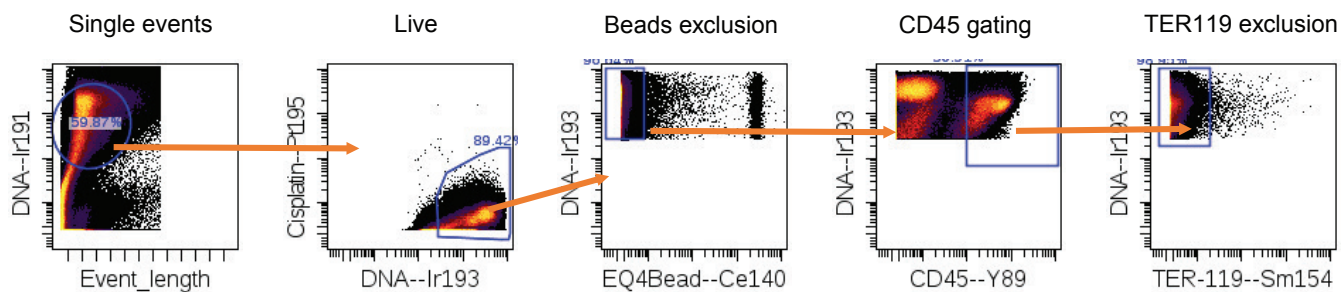

B

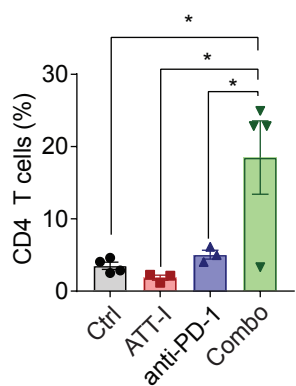

C

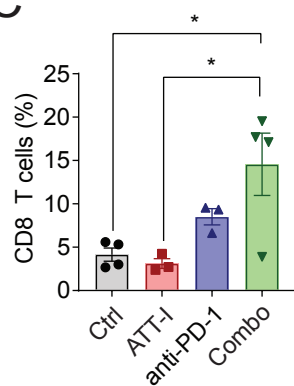

D

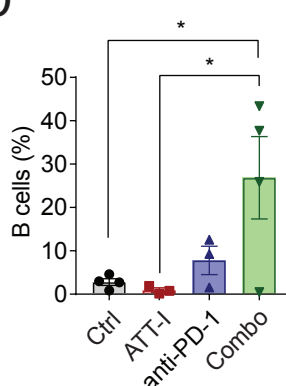

E

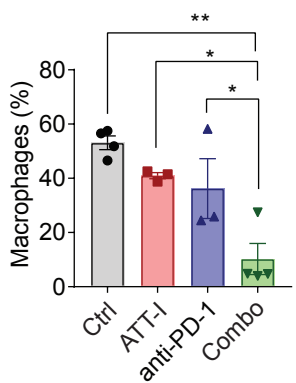

F

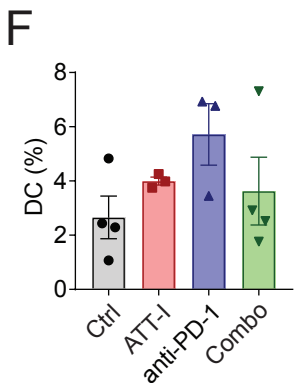

G

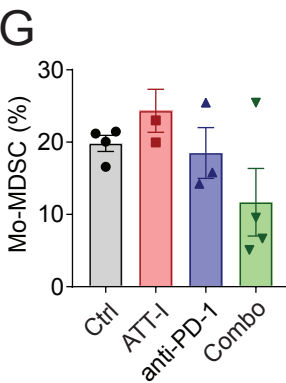

H

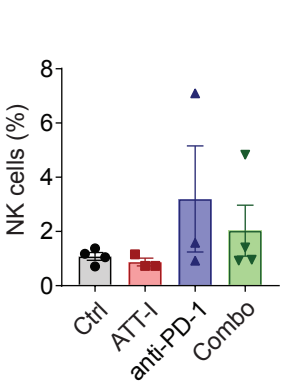

I

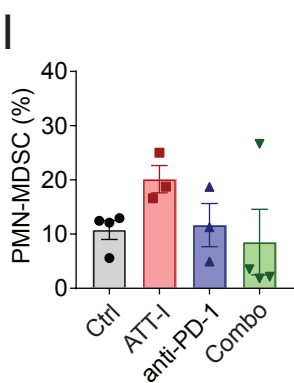

J

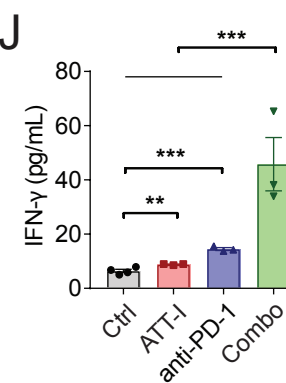

K

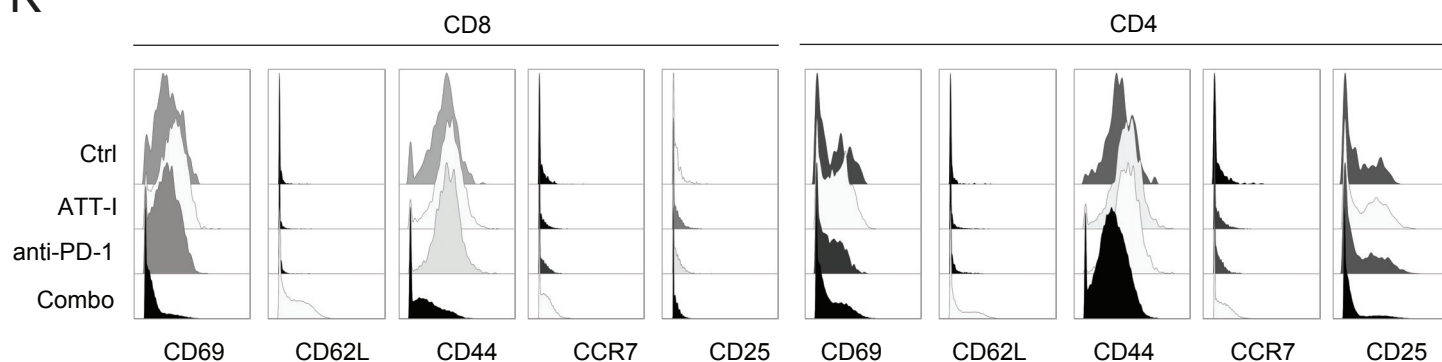



**Figure S6. Immune profile analysis of the MC38 tumors upon different treatments.**

(A), Gating strategy before running CyTOF viSNE analysis. Before running CyTOF viSNE analysis, events were selected as followed: single events (Ir191, Event Length), Live cells (Pt195, Ir193), Beads exclusion (Ir193, Ce140), CD45 gating (Ir193, CD45), TER119 exclusion (Ir193, TER119). (B-I), Statistics on the immune cell distribution of orthotopically injected MC38 cells. The figures display average frequencies of the CD45<sup>+</sup> immune cell compartment shown in Fig. 4D with the statistical significance between the different treatment groups: CD4<sup>+</sup> T cells (B), CD8<sup>+</sup> T cells (C), B cells (D), Macrophages (E), DC (F), Mo-MDSC (G), NK cells (H) and PMN-MDSC (I). Statistical analyses were conducted using one-way ANOVA. Bar plots with the scatter dots show the mean with  $\pm$  SEM. (J) IFN- $\gamma$  levels of CD8<sup>+</sup> T cells from orthotopically cecal wall implanted MC38 tumors (n=3). (K), Overlay histogram plots generated via cytobank on the CD8<sup>+</sup> T cells and CD4<sup>+</sup> T cells are shown for the CD69, CD62L, CD44, CCR7 and CD25 markers. \*,  $p < 0.05$ ; \*\*,  $p < 0.01$ . \*\*\*,  $p < 0.001$ .

A

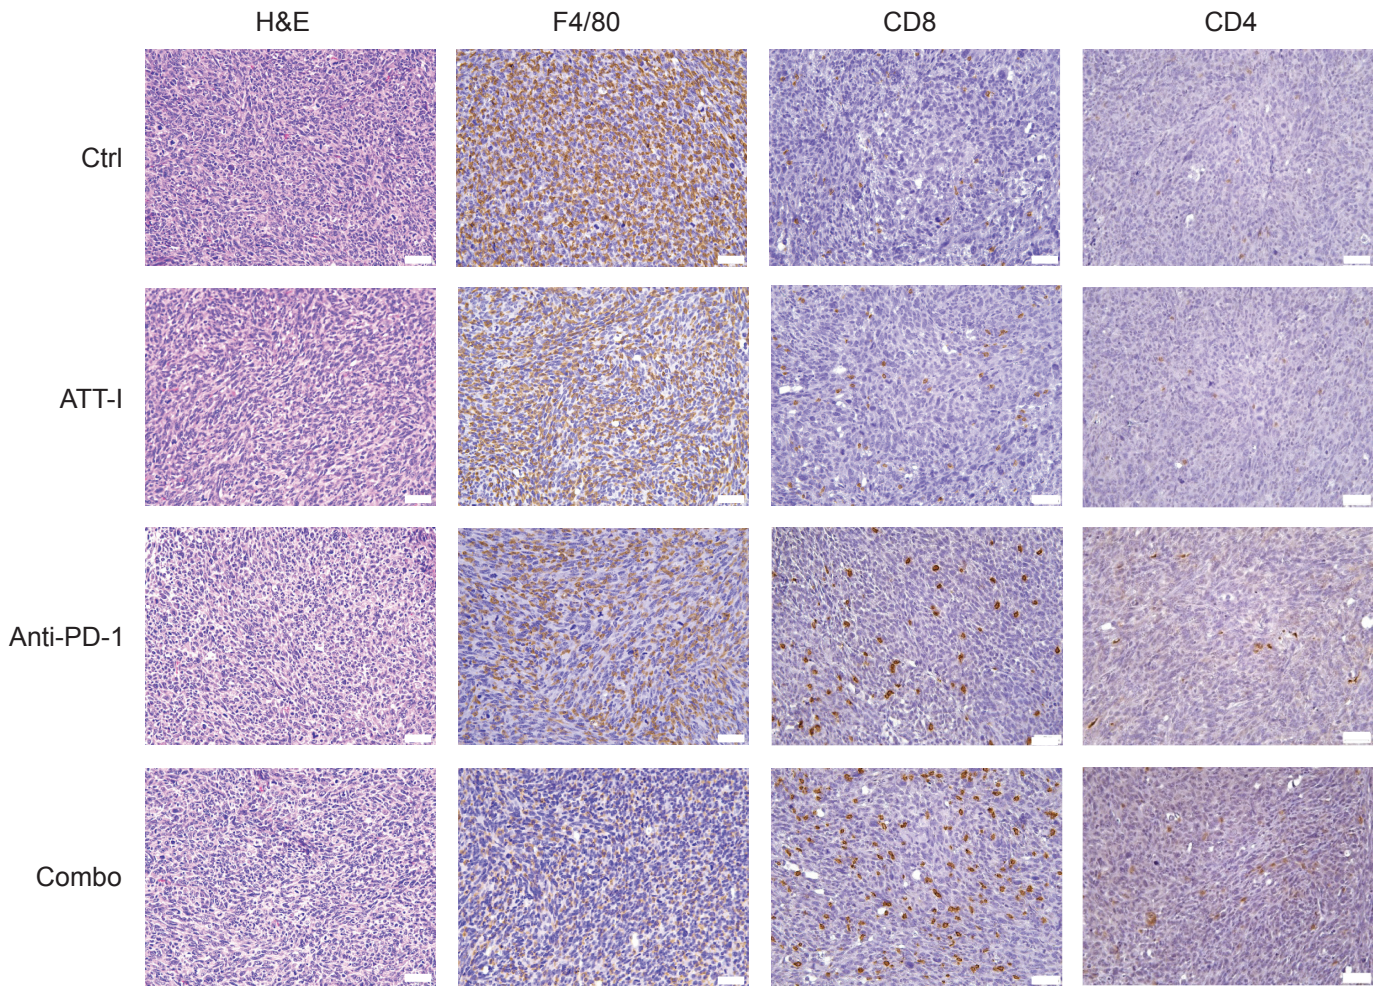

B

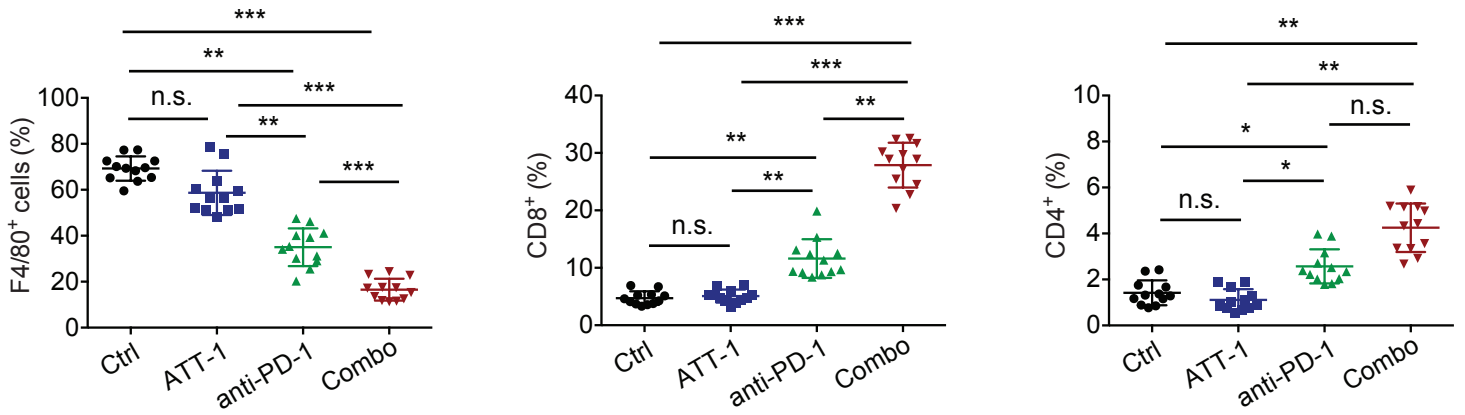

**Figure S7. ATT-I treatment in addition to PD-1 mAb treatment enhances the infiltration of CD4<sup>+</sup> and CD8<sup>+</sup> T cells while reducing the numbers of macrophages.**

**(A)** Representative histological images of MC38 tumors. Scale bar: 50  $\mu$ m. **(B)** Quantification of the images in (A) three images quantified per mouse with a total of 4 mice per group (n=4). Each data point shown in y-axis refers to the percentage of the indicated positive cells in total cells of an image. We quantified 12 images in each group using the ImageJ software. Statistical analyses were conducted using one-way ANOVA test. .\*,  $p < 0.05$ ; \*\*,  $p < 0.01$ ; \*\*\*,  $p < 0.001$ ; ns, not significant.



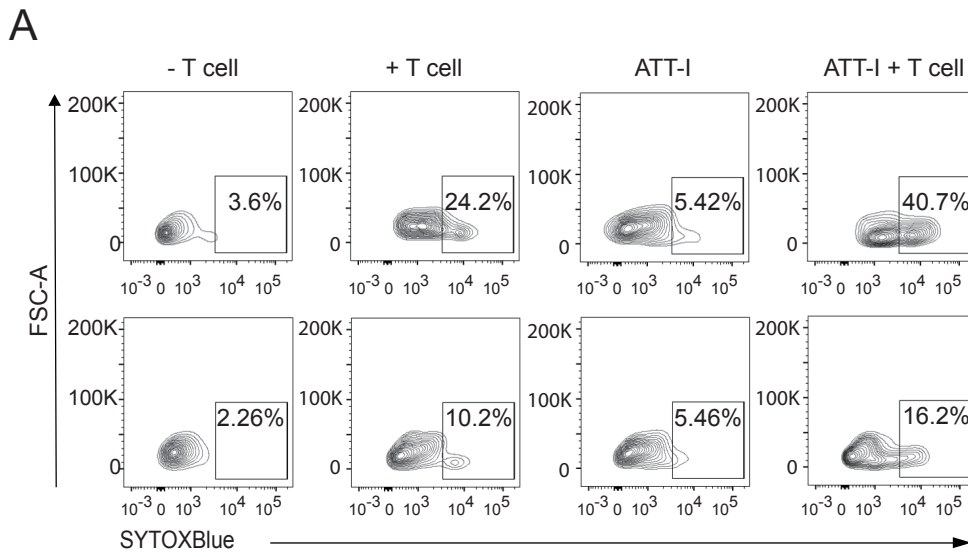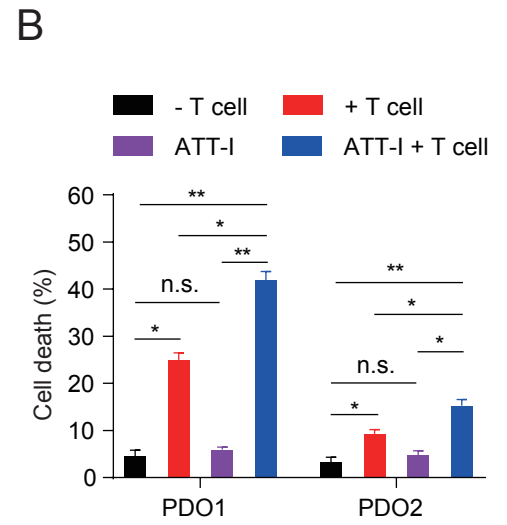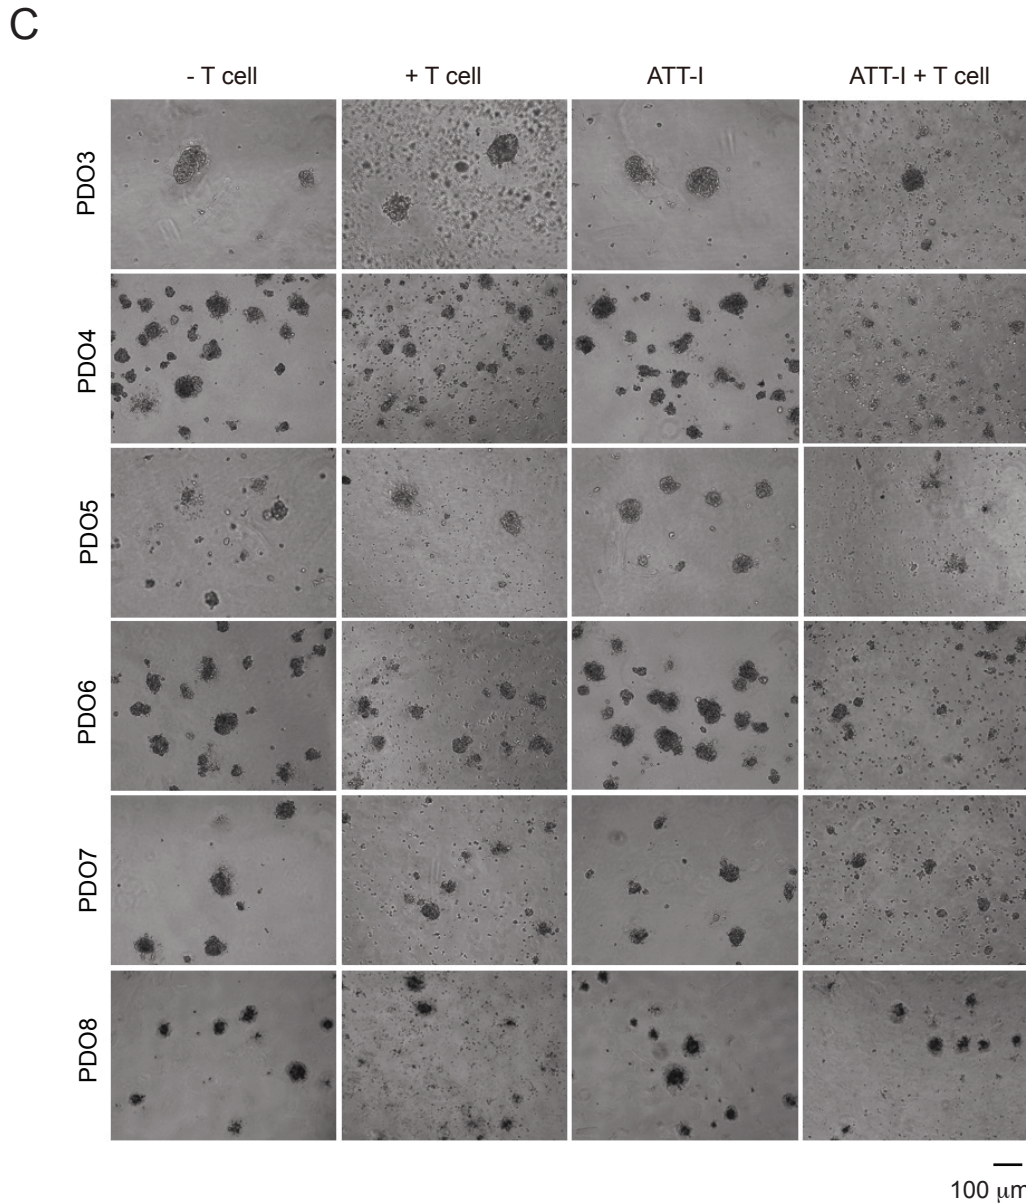

**Figure S8. The ATT-I treatment enhances the tumor killing activity of CD8<sup>+</sup> T cells against patient-derived tumor organoids.** (A) Representative flow cytometric images of tumor cell death in the patient-derived tumor organoids (PDO1 and PDO2) using SYTOXBlue staining. (B) Quantification of the SYTOXBlue cell death from (A). Statistical analyses were conducted using one-way ANOVA test. (C) Microscopic images of PDO co-cultured with autologous CD8<sup>+</sup> T cells in the presence or absence of ATT-I (5  $\mu$ M) from PDO3-8. Scale bar: 100  $\mu$ m. \*,  $p < 0.05$ ; \*\*,  $p < 0.01$ ; ns, not significant.

Figure S9

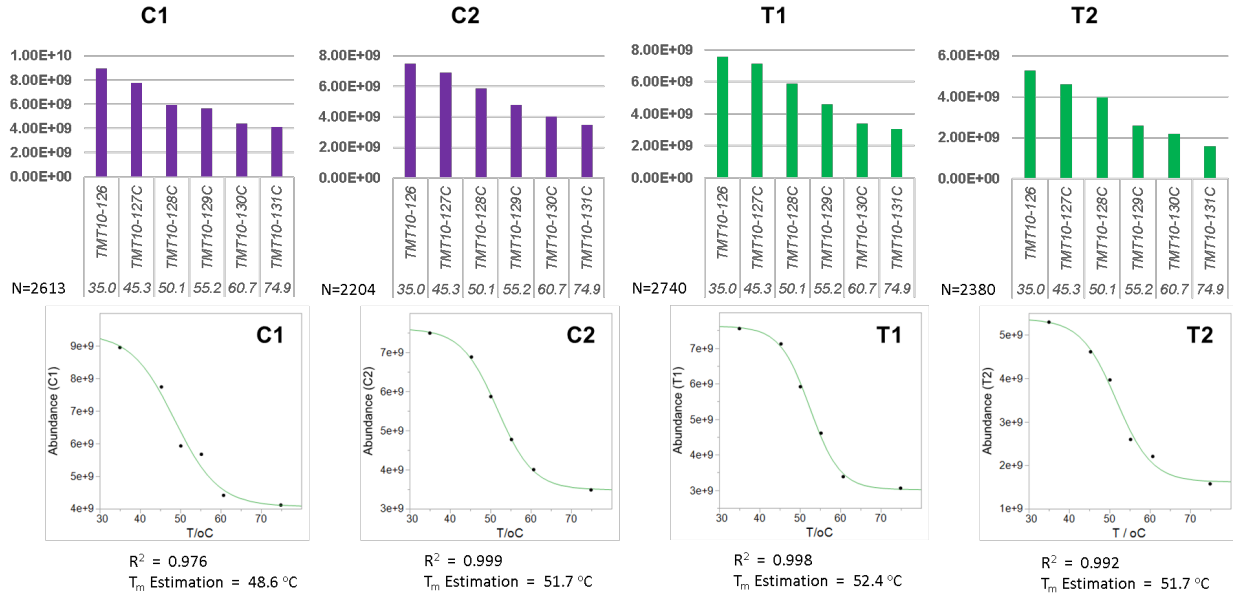

**Figure S9. Total summation of TMT quantitative channels of proteins in each experiment and respective JMP GUI based simulated total proteome melt curves. C1, C2, T1, and T2 denotes, Control 1; Control 2 representing two DMSO treatments and Treatment 1 and Treatment 2 representing two compound treatments respectively. Total summation of TMT channels for each experiment was calculated using proteins quantified with at least one peptide quantified with  $PEP \leq 0.05$  and unique to the protein.**

Figure S10

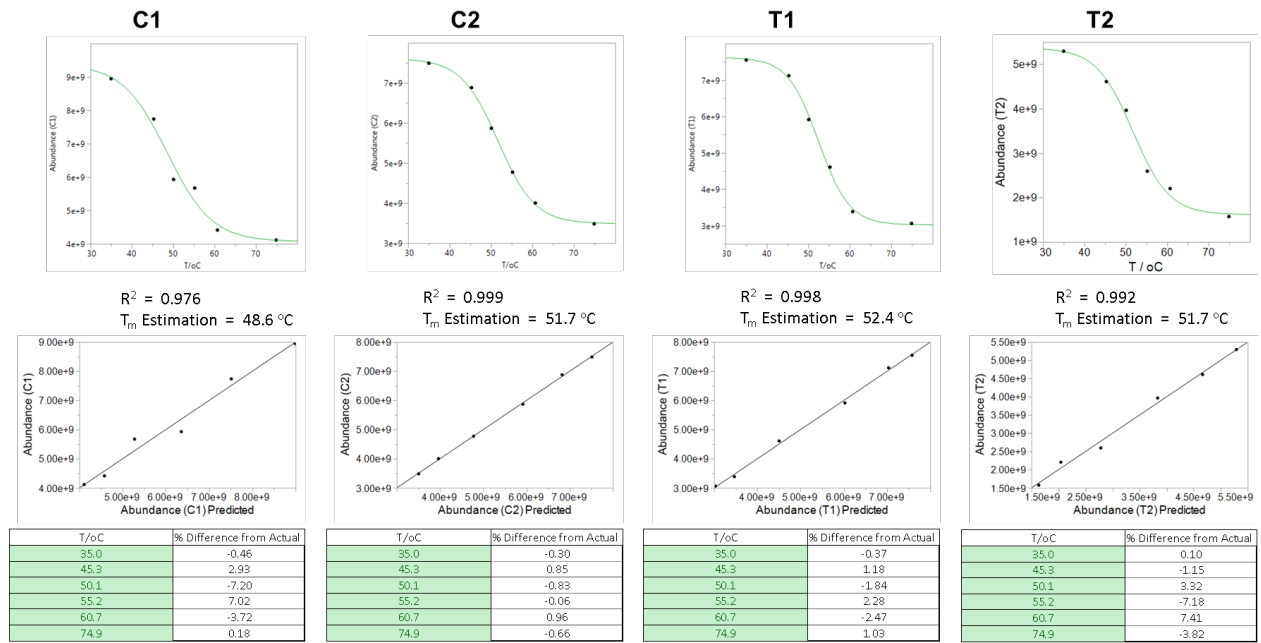

Figure S10. Correlation plots of actual and predicted protein denaturation curves and % differences from actual.

Figure S11

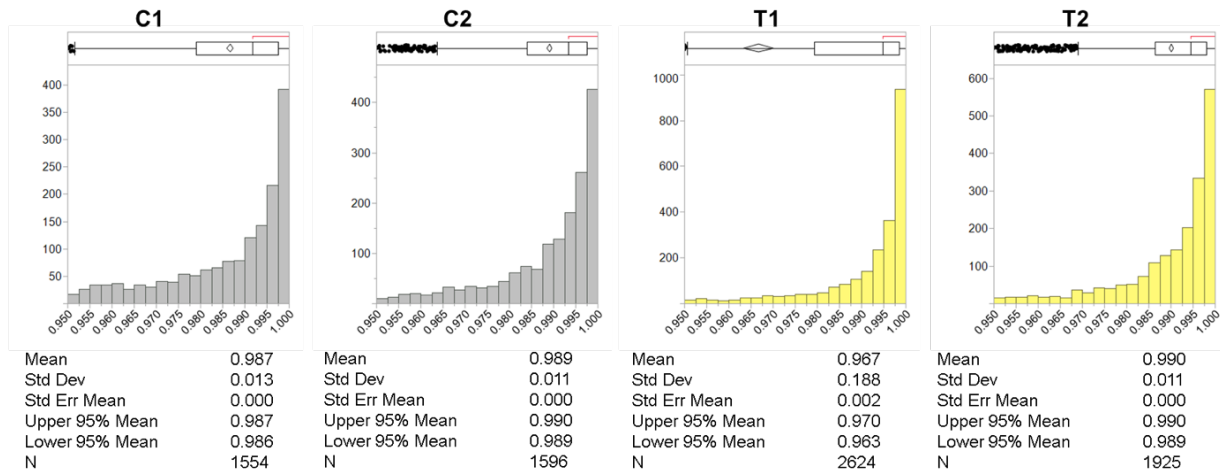

Figure S11.  $R^2$  distribution evaluation (Conditional)— $R^2 \geq 0.95$  and  $35 \text{ }^\circ\text{C} \leq T_m \leq 90 \text{ }^\circ\text{C}$  in each sample.



**Table S1. Cytotoxicity of compounds on MC38 tumor cells and mouse T cells, respectively.**The values are the percentage of viability of MC38 and CD8<sup>+</sup> T cells and their standard deviation.

| NO. | Name                                          | CAS         | MC38 Mean | MC38 STDV | T Cell Mean | T Cell STDV |
|-----|-----------------------------------------------|-------------|-----------|-----------|-------------|-------------|
| 1   | 5-HTP                                         | 56-69-9     | 0.827     | 0.008     | 0.867       | 0.021       |
| 2   | 2-Methoxycinnamic acid                        | 6099-03-2   | 0.823     | 0.017     | 0.857       | 0.004       |
| 3   | 8-Hydroxy-2-Methyl-Chromen-4-One              | 22105-14-2  | 0.823     | 0.013     | 0.751       | 0.011       |
| 4   | 1,8-Dihydroxyanthraquinone                    | 117-10-2    | 0.767     | 0.021     | 0.860       | 0.016       |
| 5   | 5-Methyl-7-methoxyisoflavone                  | 82517-12-2  | 0.361     | 0.016     | 0.339       | 0.013       |
| 6   | Chelerythrine                                 | 476-32-4    | 0.919     | 0.011     | 0.976       | 0.013       |
| 7   | 10-Deacetylbaicatin III                       | 32981-86-5  | 0.929     | 0.016     | 0.969       | 0.008       |
| 8   | 4-Methylumbelliferone                         | 90-33-5     | 0.860     | 0.032     | 0.956       | 0.049       |
| 9   | Wolfogine                                     |             | 0.917     | 0.018     | 0.848       | 0.012       |
| 10  | Punicalagin                                   | 65995-63-3  | 0.944     | 0.033     | 0.872       | 0.013       |
| 11  | Arecoline                                     | 300-08-3    | 0.847     | 0.028     | 0.796       | 0.023       |
| 12  | 20(R)-Protopanaxadiol                         | 7755-01-3   | 0.921     | 0.013     | 0.821       | 0.016       |
| 13  | 5-Hydroxymethylfurfural                       | 67-47-0     | 0.744     | 0.017     | 0.774       | 0.011       |
| 14  | Borneol                                       | 507-70-0    | 0.831     | 0.023     | 0.767       | 0.030       |
| 15  | 3-O-Methylgalangin                            | 6665-74-3   | 0.659     | 0.061     | 0.601       | 0.006       |
| 16  | 4'-O-beta-Glucopyranosyl-5-O-Methylvisamminol | 84272-85-5  | 0.818     | 0.024     | 0.726       | 0.006       |
| 17  | 1,5-dihydroxy-2,3,7-trimethoxyxanthen-9-one   | 89240-40-4  | 0.642     | 0.043     | 0.642       | 0.018       |
| 18  | 6-Gingerol                                    | 23513-14-6  | 0.859     | 0.047     | 0.876       | 0.020       |
| 19  | Methyl 2-naphthyl ether                       | 93-04-9     | 0.879     | 0.001     | 0.802       | 0.015       |
| 20  | 4-Demethylepipodophyllotoxin                  | 6559-91-7   | 0.823     | 0.020     | 0.818       | 0.009       |
| 21  | Cantharidin                                   | 56-25-7     | 0.813     | 0.028     | 0.852       | 0.028       |
| 22  | Ligucyeronol                                  |             | 0.833     | 0.035     | 0.817       | 0.016       |
| 23  | 7-Ethyl-10-hydroxycamptothecin                | 86639-52-3  | 1.002     | 0.042     | 0.882       | 0.013       |
| 24  | 1-hydroxy,2,3,5-trimethoxyxanthone            | 22804-49-5  | 0.766     | 0.008     | 0.681       | 0.012       |
| 25  | Pseudolaric acid-B                            | 82508-31-4  | 0.987     | 0.006     | 0.980       | 0.013       |
| 26  | Methyl 3,4-dihydroxybenzoate                  | 2150-43-8   | 0.820     | 0.023     | 0.907       | 0.008       |
| 27  | L-Epicatechin                                 | 490-46-0    | 0.782     | 0.008     | 0.756       | 0.047       |
| 28  | (-)-Epigallocatechin                          | 970-74-1    | 0.939     | 0.025     | 0.885       | 0.016       |
| 29  | (-)-Epigallocatechin gallate                  | 989-51-5    | 0.892     | 0.044     | 0.749       | 0.024       |
| 30  | Epigallocatechin gallate                      | 1257-08-5   | 0.498     | 0.045     | 0.557       | 0.057       |
| 31  | Ecdysterone                                   | 5289-74-7   | 0.952     | 0.055     | 0.936       | 0.016       |
| 32  | 1-Acetoxy-5-deacetyl-baccatin I               | 119120-27-3 | 0.471     | 0.012     | 0.368       | 0.006       |
| 33  | 4-Methylesculetin                             | 529-84-0    | 0.916     | 0.021     | 0.847       | 0.021       |
| 34  | Bulleyaconitine A                             | 107668-79-1 | 0.697     | 0.011     | 0.736       | 0.035       |
| 35  | Oridonin                                      | 28957-04-2  | 0.861     | 0.025     | 0.788       | 0.008       |
| 36  | Fraxinellone                                  | 28808-62-0  | 0.984     | 0.091     | 0.906       | 0.013       |
| 37  | Docetaxel                                     | 114977-28-5 | 0.821     | 0.014     | 0.742       | 0.004       |
| 38  | Ethyl 4-hydroxybenzoate                       | 120-47-8    | 0.954     | 0.018     | 0.878       | 0.009       |
| 39  | Vincristine                                   | 57-22-7     | 0.655     | 0.086     | 0.737       | 0.048       |
| 40  | Indigo                                        | 482-89-3    | 0.865     | 0.037     | 0.850       | 0.026       |
| 41  | Allicin                                       | 539-86-6    | 0.823     | 0.020     | 0.838       | 0.030       |
| 42  | Asperosaponin VI                              | 39524-08-8  | 0.251     | 0.057     | 0.248       | 0.033       |
| 43  | Tanshinone I                                  | 568-73-0    | 0.955     | 0.059     | 0.854       | 0.025       |
| 44  | Vincamine                                     | 1617-90-9   | 0.909     | 0.025     | 0.877       | 0.006       |
| 45  | Cordycepin                                    | 73-03-0     | 0.936     | 0.005     | 0.906       | 0.010       |
| 46  | Juniper camphor                               | 53840-55-4  | 0.883     | 0.003     | 0.829       | 0.023       |
| 47  | Ilexoside A                                   |             | 0.673     | 0.008     | 0.765       | 0.012       |
| 48  | Indirubin                                     | 479-41-4    | 0.925     | 0.010     | 0.864       | 0.011       |
| 49  | Catharanthine                                 | 2468-21-5   | 0.834     | 0.045     | 0.777       | 0.006       |
| 50  | Scopoletin                                    | 92-61-5     | 0.818     | 0.028     | 0.812       | 0.015       |
| 51  | Diosmin                                       | 520-27-4    | 0.862     | 0.042     | 0.849       | 0.021       |
| 52  | Irisflorentin                                 | 41743-73-1  | 0.881     | 0.001     | 0.729       | 0.022       |
| 53  | Mollugin                                      | 55481-88-4  | 0.657     | 0.002     | 0.546       | 0.015       |
| 54  | Soy isoflavone                                |             | 0.866     | 0.037     | 0.777       | 0.006       |
| 55  | Farrerol                                      | 24211-30-1  | 0.863     | 0.006     | 0.931       | 0.006       |
| 56  | Halofuginone                                  | 55837-20-2  | 0.892     | 0.025     | 0.879       | 0.024       |
| 57  | Acetate gossypol                              | 12542-36-8  | 0.851     | 0.029     | 0.721       | 0.018       |
| 58  | Salvianolic acid B                            | 115939-25-8 | 0.906     | 0.007     | 0.851       | 0.013       |
| 59  | Hesperetin                                    | 520-33-2    | 0.453     | 0.026     | 0.343       | 0.031       |
| 60  | Bavachalcone                                  | 28448-85-3  | 0.822     | 0.022     | 0.785       | 0.009       |
| 61  | Febrifugine                                   | 24159-07-7  | 0.896     | 0.012     | 0.915       | 0.008       |
| 62  | Digoxin                                       | 20830-75-5  | 0.761     | 0.042     | 0.662       | 0.013       |
| 63  | Atractylon                                    | 6989-21-5   | 0.882     | 0.013     | 0.697       | 0.008       |
| 64  | Stigmasterol                                  | 68555-08-8  | 0.824     | 0.014     | 0.854       | 0.006       |
| 65  | Homoharringtonine                             | 26833-87-4  | 0.870     | 0.007     | 0.884       | 0.011       |
| 66  | Geniposide                                    | 24512-63-8  | 0.821     | 0.016     | 0.807       | 0.008       |
| 67  | Koumine                                       | 1358-76-5   | 0.918     | 0.013     | 0.884       | 0.011       |
| 68  | Pachymic acid                                 | 29070-92-6  | 0.933     | 0.001     | 0.879       | 0.019       |
| 69  | Catechin                                      | 7295-85-4   | 0.882     | 0.015     | 0.829       | 0.011       |
| 70  | Pogostone                                     | 23800-56-8  | 0.913     | 0.011     | 0.888       | 0.014       |
| 71  | Cyclovirobuxine                               | 860-79-7    | 0.675     | 0.011     | 0.483       | 0.013       |
| 72  | Geniposidic acid                              | 27741-01-1  | 0.858     | 0.021     | 0.855       | 0.018       |
| 73  | Thermopsine                                   | 486-90-8    | 0.816     | 0.010     | 0.854       | 0.025       |
| 74  | Picroside I                                   | 27409-30-9  | 0.351     | 0.029     | 0.346       | 0.023       |
| 75  | Homovanillic acid                             | 306-08-1    | 0.864     | 0.021     | 0.808       | 0.004       |
| 76  | Echinacoside                                  | 82854-37-3  | 0.823     | 0.008     | 0.810       | 0.011       |
| 77  | Buxtauine                                     | 4236-73-1   | 0.909     | 0.006     | 0.827       | 0.021       |
| 78  | Phellodendrine                                | 6873-13-18  | 0.863     | 0.037     | 0.825       | 0.018       |
| 79  | Methyl hesperidin                             | 11013-97-1  | 0.886     | 0.028     | 0.828       | 0.009       |
| 80  | Galanthamine                                  | 357-70-0    | 0.931     | 0.040     | 0.898       | 0.004       |
| 81  | Glabridin                                     | 59870-68-7  | 0.841     | 0.009     | 0.819       | 0.025       |
| 82  | Palmatine                                     | 3486-67-7   | 0.954     | 0.023     | 0.819       | 0.017       |
| 83  | Trigonelline                                  | 535-83-1    | 0.378     | 0.016     | 0.325       | 0.033       |
| 84  | P-Hydroxyphenyl butanone                      | 5471-51-2   | 0.849     | 0.025     | 0.846       | 0.034       |
| 85  | Xanthoxylin                                   | 90-24-4     | 0.667     | 0.018     | 0.681       | 0.013       |

|     |                                      |             |       |       |       |       |
|-----|--------------------------------------|-------------|-------|-------|-------|-------|
| 86  | Lappaconitine                        | 32854-75-4  | 0.857 | 0.055 | 0.880 | 0.011 |
| 87  | Phloretin                            | 60-82-2     | 0.931 | 0.040 | 0.855 | 0.008 |
| 88  | Dihydroguaiaretic acid               | 66322-34-7  | 0.919 | 0.009 | 0.924 | 0.010 |
| 89  | Fisetin                              | 528-48-3    | 0.681 | 0.016 | 0.564 | 0.021 |
| 90  | Xanthotol                            | 2009-24-7   | 0.846 | 0.028 | 0.821 | 0.011 |
| 91  | Quercitrin                           | 522-12-3    | 0.652 | 0.021 | 0.748 | 0.018 |
| 92  | Pimpinellin                          | 131-12-4    | 0.820 | 0.016 | 0.694 | 0.018 |
| 93  | Fumaric acid                         | 110-17-8    | 0.857 | 0.028 | 0.766 | 0.047 |
| 94  | Pinocembrin                          | 480-39-7    | 0.885 | 0.025 | 0.838 | 0.028 |
| 95  | Sodium tauroursodeoxycholate         | 14605-22-2  | 0.863 | 0.010 | 0.821 | 0.001 |
| 96  | Rebaudioside A                       | 58543-16-1  | 0.839 | 0.011 | 0.821 | 0.013 |
| 97  | Icariine                             |             | 0.858 | 0.021 | 0.817 | 0.021 |
| 98  | Rosavin                              | 84954-92-7  | 0.818 | 0.021 | 0.784 | 0.011 |
| 99  | Blinin                               | 125675-09-4 | 0.956 | 0.033 | 0.848 | 0.043 |
| 100 | Theobromine                          | 83-67-0     | 0.946 | 0.027 | 0.862 | 0.020 |
| 101 | Nepetalactone                        | 490-10-8    | 0.872 | 0.016 | 0.818 | 0.013 |
| 102 | Pinostrubin                          | 480-37-5    | 0.870 | 0.019 | 0.830 | 0.013 |
| 103 | Aloperine                            | 56293-29-9  | 0.825 | 0.017 | 0.796 | 0.009 |
| 104 | Oroxin B                             | 114482-86-9 | 0.868 | 0.035 | 0.850 | 0.004 |
| 105 | Calycosin-7-glucoside                | 20633-67-4  | 0.951 | 0.016 | 0.854 | 0.008 |
| 106 | 4-Quinolone                          | 611-36-9    | 0.500 | 0.015 | 0.404 | 0.018 |
| 107 | Pomolic Acid                         | 13849-91-7  | 0.928 | 0.028 | 0.854 | 0.010 |
| 108 | Ergosterol                           | 57-87-4     | 0.860 | 0.009 | 0.819 | 0.012 |
| 109 | Veratric acid                        | 93-07-2     | 0.519 | 0.012 | 0.448 | 0.016 |
| 110 | Demethoxycurcumin                    | 33171-16-3  | 0.779 | 0.121 | 0.596 | 0.011 |
| 111 | Rosmarinic acid                      | 20283-92-5  | 0.870 | 0.021 | 0.785 | 0.016 |
| 112 | Malic acid                           | 6915-15-7   | 0.819 | 0.012 | 0.762 | 0.013 |
| 113 | 5-Hydroxy-4-methoxycanthin-6-one     | 18110-86-6  | 0.822 | 0.018 | 0.810 | 0.003 |
| 114 | Scopolamine hydrobromide             | 6533-68-2   | 0.789 | 0.022 | 0.784 | 0.011 |
| 115 | Acteoside                            | 61276-17-3  | 0.856 | 0.008 | 0.819 | 0.011 |
| 116 | Atractylenolide I                    | 73069-13-3  | 0.957 | 0.016 | 0.873 | 0.008 |
| 117 | Reserpine                            | 50-55-5     | 0.469 | 0.011 | 0.450 | 0.016 |
| 118 | Mogroside V                          | 88901-36-4  | 0.803 | 0.048 | 0.859 | 0.031 |
| 119 | Gallic acid                          | 149-91-7    | 0.918 | 0.021 | 0.883 | 0.015 |
| 120 | Loganic acid                         | 22255-40-9  | 0.587 | 0.025 | 0.526 | 0.013 |
| 121 | Erianin                              | 95041-90-0  | 0.821 | 0.023 | 0.807 | 0.006 |
| 122 | Friedelin                            | 559-74-0    | 0.928 | 0.034 | 0.876 | 0.006 |
| 123 | Quinine                              | 130-95-0    | 0.824 | 0.009 | 0.783 | 0.011 |
| 124 | Lathyrol                             | 34420-19-4  | 0.809 | 0.042 | 0.807 | 0.006 |
| 125 | Taurochenodeoxycholic acid           | 516-35-8    | 0.887 | 0.008 | 0.827 | 0.006 |
| 126 | Oroxin A                             | 57396-78-8  | 0.829 | 0.005 | 0.773 | 0.011 |
| 127 | Guanosine                            | 118-00-3    | 0.816 | 0.007 | 0.862 | 0.025 |
| 128 | Arecoline hydrobromide               | 300-08-3    | 0.833 | 0.007 | 0.767 | 0.011 |
| 129 | 1,8-Diacetoxy-3-carboxyanthraquinone | 13739-02-1  | 0.821 | 0.027 | 0.808 | 0.004 |
| 130 | Anhydroicariin                       | 38226-86-7  | 0.913 | 0.028 | 0.824 | 0.010 |
| 131 | Camptothecin                         | 7689-03-4   | 0.743 | 0.047 | 0.627 | 0.009 |
| 132 | Aconitine                            | 302-27-2    | 0.816 | 0.020 | 0.869 | 0.028 |
| 133 | Bisdemethoxycurcumin                 | 33171-05-0  | 0.840 | 0.023 | 0.817 | 0.006 |
| 134 | Carabrone                            | 1748-81-8   | 0.864 | 0.010 | 0.838 | 0.011 |
| 135 | Gambogic acid                        | 2752-65-0   | 0.917 | 0.035 | 0.831 | 0.005 |
| 136 | Spinosin                             | 72063-39-9  | 0.835 | 0.004 | 0.846 | 0.015 |
| 137 | Orcinol glucoside                    | 21082-33-7  | 0.829 | 0.008 | 0.862 | 0.018 |
| 138 | Cimifugin                            | 37921-38-3  | 0.954 | 0.033 | 0.903 | 0.013 |
| 139 | Notoginsenoside Fe                   | 88105-29-7  | 0.806 | 0.004 | 0.763 | 0.025 |
| 140 | Notoginsenoside Fc                   | 88122-52-5  | 0.788 | 0.035 | 0.720 | 0.001 |
| 141 | Physalin L                           | 113146-74-0 | 0.914 | 0.030 | 0.875 | 0.009 |
| 142 | Stevioside                           | 57817-89-7  | 0.869 | 0.018 | 0.829 | 0.008 |
| 143 | Notoginsenoside Ft1                  | 80418-24-2  | 0.877 | 0.021 | 0.853 | 0.009 |
| 144 | Seabuckthorn flavone                 |             | 1.023 | 0.035 | 0.887 | 0.008 |
| 145 | Cephalomannine                       | 71610-00-9  | 0.907 | 0.007 | 0.868 | 0.006 |
| 146 | Phytolaccagenin                      | 1802-12-6   | 0.871 | 0.033 | 0.883 | 0.022 |
| 147 | Thymol                               | 89-83-8     | 0.871 | 0.023 | 0.825 | 0.020 |
| 148 | 10,11-Dimethoxystrychnine            | 357-57-3    | 0.896 | 0.009 | 0.849 | 0.016 |
| 149 | Harmine                              | 442-51-3    | 0.882 | 0.013 | 0.814 | 0.005 |
| 150 | Dicoumarol                           | 66-76-2     | 0.920 | 0.022 | 0.870 | 0.004 |
| 151 | Ginsenoside F3                       | 62025-50-7  | 0.809 | 0.005 | 0.766 | 0.017 |
| 152 | Esculentoside A                      | 65497-07-6  | 0.949 | 0.031 | 0.922 | 0.015 |
| 153 | Asatone                              | 38451-63-7  | 0.886 | 0.018 | 0.847 | 0.008 |
| 154 | Topotecan                            | 123948-87-8 | 0.562 | 0.008 | 0.467 | 0.007 |
| 155 | Darutoside                           | 59219-65-7  | 0.828 | 0.009 | 0.881 | 0.014 |
| 156 | Hematoxylin                          | 517-28-2    | 0.880 | 0.016 | 0.872 | 0.014 |
| 157 | Nordihydroguaiaretic acid            | 500-38-9    | 0.853 | 0.014 | 0.770 | 0.016 |
| 158 | Rutecarpine                          | 84-26-4     | 0.720 | 0.025 | 0.671 | 0.011 |
| 159 | Asarinin                             | 133-05-1    | 0.653 | 0.017 | 0.521 | 0.016 |
| 160 | Schisantherin A                      | 58546-56-8  | 0.836 | 0.021 | 0.855 | 0.005 |
| 161 | Lycodoline                           | 6900-92-1   | 0.821 | 0.023 | 0.806 | 0.008 |
| 162 | Specnuezhenide                       | 39011-92-2  | 0.970 | 0.032 | 1.006 | 0.034 |
| 163 | Amentoflavone                        | 1617-53-4   | 0.847 | 0.013 | 0.822 | 0.015 |
| 164 | Tenuifolin                           | 20183-47-5  | 0.992 | 0.035 | 0.931 | 0.006 |
| 165 | Aucubin                              | 479-98-1    | 0.836 | 0.017 | 0.837 | 0.006 |
| 166 | Genistin                             | 529-59-9    | 0.925 | 0.020 | 0.868 | 0.005 |
| 167 | Lycorine                             | 476-28-8    | 0.877 | 0.020 | 0.868 | 0.017 |
| 168 | Ellagic acid                         | 476-66-4    | 0.857 | 0.008 | 0.820 | 0.011 |
| 169 | Dehydrocostus lactone                | 477-43-0    | 0.938 | 0.021 | 0.875 | 0.022 |
| 170 | Huperzine A                          | 102518-79-6 | 0.747 | 0.021 | 0.664 | 0.017 |
| 171 | Chrysophanol                         | 481-74-3    | 0.519 | 0.019 | 0.463 | 0.010 |
| 172 | Daidzein                             | 486-66-8    | 0.903 | 0.015 | 0.850 | 0.015 |
| 173 | Genistein                            | 446-72-0    | 0.833 | 0.040 | 0.790 | 0.011 |
| 174 | Luteolin                             | 491-70-3    | 0.863 | 0.022 | 0.830 | 0.013 |

|     |                                   |             |       |       |       |       |
|-----|-----------------------------------|-------------|-------|-------|-------|-------|
| 175 | Ginsenoside Re                    | 51542-56-4  | 0.911 | 0.008 | 0.889 | 0.007 |
| 176 | Apigenin                          | 520-36-5    | 0.972 | 0.035 | 0.884 | 0.015 |
| 177 | Colchicine                        | 64-86-8     | 0.618 | 0.021 | 0.531 | 0.012 |
| 178 | paclitaxide                       |             | 0.686 | 0.033 | 0.771 | 0.014 |
| 179 | Curcumin                          | 458-37-7    | 0.963 | 0.043 | 0.930 | 0.009 |
| 180 | Sinomenine                        | 115-53-7    | 0.822 | 0.007 | 0.808 | 0.006 |
| 181 | Shikimic acid                     | 138-59-0    | 0.314 | 0.009 | 0.362 | 0.042 |
| 182 | Chlorogenic acid                  | 327-97-9    | 0.897 | 0.008 | 0.868 | 0.006 |
| 183 | Perillartine                      | 30950-27-7  | 0.670 | 0.003 | 0.675 | 0.008 |
| 184 | Oleanic acid                      | 508-02-1    | 0.844 | 0.006 | 0.857 | 0.016 |
| 185 | Chrysin                           | 480-40-0    | 0.867 | 0.015 | 0.807 | 0.005 |
| 186 | Hederagenin                       | 465-99-6    | 0.824 | 0.014 | 0.702 | 0.015 |
| 187 | Rutin                             | 153-18-4    | 0.841 | 0.006 | 0.814 | 0.009 |
| 188 | Polydatin                         | 65914-17-2  | 0.619 | 0.017 | 0.553 | 0.021 |
| 189 | Magnolol                          | 528-43-8    | 0.815 | 0.017 | 0.778 | 0.017 |
| 190 | Physcion                          | 521-61-9    | 0.819 | 0.010 | 0.814 | 0.004 |
| 191 | Emodin                            | 518-82-1    | 0.925 | 0.034 | 0.825 | 0.011 |
| 192 | Curdione                          | 13657-68-6  | 1.000 | 0.033 | 0.906 | 0.009 |
| 193 | Quercetin                         | 6151-25-3   | 0.840 | 0.008 | 0.882 | 0.012 |
| 194 | Ginsenoside Rg3                   | 14197-60-5  | 0.874 | 0.010 | 0.857 | 0.006 |
| 195 | Ginsenoside Rg1                   | 22427-39-0  | 0.930 | 0.010 | 0.968 | 0.006 |
| 196 | Resveratrol                       | 501-36-0    | 0.737 | 0.049 | 0.673 | 0.011 |
| 197 | Astragaloside A                   | 83207-58-3  | 0.901 | 0.012 | 0.872 | 0.008 |
| 198 | Honokiol                          | 35354-74-6  | 0.939 | 0.025 | 0.919 | 0.009 |
| 199 | Astragaloside II                  | 84676-89-1  | 0.922 | 0.014 | 0.963 | 0.011 |
| 200 | Sophoridine                       | 6882-68-4   | 0.565 | 0.021 | 0.489 | 0.010 |
| 201 | Imperatorin                       | 482-44-0    | 0.838 | 0.001 | 0.816 | 0.005 |
| 202 | Nodakenin                         | 495-31-8    | 0.864 | 0.020 | 0.850 | 0.018 |
| 203 | Pterostilbene                     | 537-42-8    | 0.908 | 0.010 | 0.882 | 0.011 |
| 204 | Glycyrrhethnic acid               | 471-53-4    | 0.825 | 0.018 | 0.813 | 0.006 |
| 205 | Aloin                             | 1415-73-2   | 0.689 | 0.029 | 0.721 | 0.027 |
| 206 | Piperine                          | 94-62-2     | 0.834 | 0.020 | 0.861 | 0.017 |
| 207 | Ginsenoside Rb1                   | 41753-43-9  | 0.818 | 0.008 | 0.781 | 0.012 |
| 208 | Hyperoside                        | 482-36-0    | 0.874 | 0.014 | 0.888 | 0.015 |
| 209 | Kaempferol                        | 520-18-3    | 0.827 | 0.014 | 0.816 | 0.008 |
| 210 | Andrographolide                   | 5508-58-7   | 0.890 | 0.001 | 0.809 | 0.008 |
| 211 | Paeonol                           | 552-41-0    | 0.930 | 0.010 | 0.842 | 0.010 |
| 212 | Artemisinin                       | 63968-64-9  | 0.584 | 0.008 | 0.556 | 0.006 |
| 213 | Brucine                           | 57-24-9     | 0.996 | 0.009 | 0.928 | 0.016 |
| 214 | Tanshinone IIA                    | 568-72-9    | 0.927 | 0.008 | 0.876 | 0.008 |
| 215 | Bilobalide                        | 33570-04-6  | 0.830 | 0.010 | 0.859 | 0.013 |
| 216 | Puerarin                          | 3681-99-0   | 0.887 | 0.006 | 0.814 | 0.009 |
| 217 | Glycyrrhizic acid                 | 1405-86-3   | 0.935 | 0.012 | 0.893 | 0.012 |
| 218 | Guaiacin                          | 36531-08-5  | 0.390 | 0.027 | 0.436 | 0.023 |
| 219 | Sclareolide                       | 564-20-5    | 0.926 | 0.008 | 0.882 | 0.013 |
| 220 | Oxypeucedanin                     | 737-52-0    | 0.905 | 0.003 | 0.907 | 0.006 |
| 221 | Raceanisodamine                   | 134355-54-7 | 0.887 | 0.006 | 0.876 | 0.008 |
| 222 | Neosperidin dihydrochalcone       | 20702-77-6  | 0.825 | 0.011 | 0.810 | 0.003 |
| 223 | Catalpol                          | 2415-24-9   | 0.884 | 0.010 | 0.855 | 0.035 |
| 224 | Lupenone                          | 1617-70-5   | 0.702 | 0.042 | 0.761 | 0.001 |
| 225 | Yohimbine                         | 146-48-5    | 0.941 | 0.014 | 0.925 | 0.008 |
| 226 | Securinine                        | 5610-40-2   | 0.837 | 0.008 | 0.867 | 0.008 |
| 227 | Isoferulic acid                   | 537-73-5    | 0.867 | 0.018 | 0.866 | 0.030 |
| 228 | Epmedin C                         | 110642-44-9 | 0.981 | 0.016 | 0.823 | 0.023 |
| 229 | Myricitrin                        | 17912-87-7  | 0.761 | 0.015 | 0.656 | 0.008 |
| 230 | Bengenin                          | 477-90-7    | 0.868 | 0.033 | 0.822 | 0.008 |
| 231 | Tectorigenin                      | 548-77-6    | 0.862 | 0.035 | 0.795 | 0.009 |
| 232 | L-abrine                          | 21339-55-9  | 0.863 | 0.009 | 0.858 | 0.033 |
| 233 | Emetine dihydrochloride           | 316-42-7    | 0.839 | 0.009 | 0.876 | 0.019 |
| 234 | Sesamol                           | 533-31-3    | 0.896 | 0.013 | 0.867 | 0.006 |
| 235 | Isoorientin                       | 4261-42-1   | 0.703 | 0.015 | 0.753 | 0.010 |
| 236 | Leonurine hydrochloride           | 24697-74-3  | 0.784 | 0.011 | 0.710 | 0.003 |
| 237 | Harmine hydrochloride             | 343-27-1    | 0.817 | 0.022 | 0.844 | 0.011 |
| 238 | D-Ephedrine hydrochloride         | 24221-86-1  | 0.923 | 0.005 | 0.872 | 0.013 |
| 239 | 6-Methoxyluteolin                 | 520-11-6    | 0.848 | 0.013 | 0.815 | 0.004 |
| 240 | Quinic acid                       | 77-95-2     | 0.923 | 0.018 | 0.839 | 0.011 |
| 241 | Skimmin                           | 93-39-0     | 0.870 | 0.019 | 0.820 | 0.004 |
| 242 | Isorhamnetin-3-O-neohesperidoside | 55033-90-4  | 0.781 | 0.011 | 0.814 | 0.003 |
| 243 | Astragalin                        | 480-10-4    | 0.877 | 0.018 | 0.843 | 0.011 |
| 244 | Acetyl-trans-resveratrol          | 42206-94-0  | 0.919 | 0.009 | 0.914 | 0.016 |
| 245 | Isocurcumenol                     | 24063-71-6  | 0.656 | 0.008 | 0.546 | 0.008 |
| 246 | Isorhynchophylline                | 6859-01-4   | 0.886 | 0.007 | 0.829 | 0.011 |
| 247 | Sclareol                          | 515-03-7    | 0.946 | 0.034 | 0.957 | 0.023 |
| 248 | Typhaneoside                      | 104472-68-6 | 0.839 | 0.011 | 0.825 | 0.006 |
| 249 | Diosmetin                         | 520-34-3    | 0.913 | 0.019 | 0.857 | 0.006 |
| 250 | Ginkgolide C                      | 15291-76-6  | 0.846 | 0.014 | 0.872 | 0.008 |
| 251 | Osthole                           | 484-12-8    | 0.898 | 0.010 | 0.901 | 0.013 |
| 252 | D(-)-Salicin                      | 138-52-3    | 0.864 | 0.024 | 0.817 | 0.008 |
| 253 | Isoimperatorin                    | 482-45-1    | 0.791 | 0.017 | 0.817 | 0.020 |
| 254 | Ginkgolide B                      | 15291-77-7  | 0.857 | 0.009 | 0.858 | 0.004 |
| 255 | Ginkgolide A                      | 15291-75-5  | 1.009 | 0.028 | 0.822 | 0.013 |
| 256 | Evodiamine                        | 518-17-2    | 0.678 | 0.016 | 0.708 | 0.006 |
| 257 | Silibinin                         | 22888-70-6  | 0.899 | 0.016 | 0.878 | 0.022 |
| 258 | Naringin                          | 10236-47-2  | 0.650 | 0.009 | 0.673 | 0.008 |
| 259 | Gastrodin                         | 62499-27-8  | 0.901 | 0.003 | 0.872 | 0.013 |
| 260 | Arbutin                           | 497-76-7    | 0.880 | 0.006 | 0.816 | 0.011 |
| 261 | Dehydrocostus lactone             | 477-43-0    | 0.812 | 0.013 | 0.823 | 0.008 |
| 262 | Betulin                           | 473-98-3    | 0.886 | 0.001 | 0.832 | 0.006 |
| 263 | Cardamonin                        | 18956-16-6  | 0.850 | 0.004 | 0.816 | 0.008 |

|     |                                                                    |             |       |       |       |       |
|-----|--------------------------------------------------------------------|-------------|-------|-------|-------|-------|
| 264 | 2,3,5,4'-Tetrahydroxyl-diphenylethylene-2-O-beta-D-glucoside       | 82373-94-2  | 0.918 | 0.008 | 0.880 | 0.013 |
| 265 | Hesperidin                                                         | 520-26-3    | 0.667 | 0.016 | 0.428 | 0.012 |
| 266 | Oroxilin A                                                         | 480-11-5    | 0.908 | 0.008 | 0.879 | 0.010 |
| 267 | Columbianadin                                                      | 5058-13-9   | 0.854 | 0.024 | 0.818 | 0.010 |
| 268 | Albiflorin                                                         | 39011-90-0  | 0.914 | 0.018 | 0.926 | 0.009 |
| 269 | Avicularin                                                         | 572-30-5    | 0.890 | 0.001 | 0.823 | 0.005 |
| 270 | Buxtauine                                                          | 4236-73-1   | 0.919 | 0.025 | 0.856 | 0.013 |
| 271 | Menisdaurin                                                        | 67765-58-6  | 0.983 | 0.004 | 0.870 | 0.002 |
| 272 | Harmine                                                            | 442-51-3    | 0.839 | 0.010 | 0.830 | 0.005 |
| 273 | Lupeol                                                             | 545-47-1    | 0.906 | 0.021 | 0.935 | 0.011 |
| 274 | Shionone                                                           | 10376-48-4  | 0.868 | 0.035 | 0.814 | 0.004 |
| 275 | Asarylaldehyde                                                     | 14374-62-0  | 0.397 | 0.012 | 0.278 | 0.011 |
| 276 | Isorhamnetin                                                       | 480-19-3    | 0.915 | 0.019 | 0.912 | 0.013 |
| 277 | Tetrahydropalmatine                                                | 2934-97-6   | 0.871 | 0.017 | 0.807 | 0.006 |
| 278 | Isopimpinellin                                                     | 482-27-9    | 0.929 | 0.011 | 0.874 | 0.009 |
| 279 | Roburic acid                                                       | 6812-81-3   | 0.827 | 0.021 | 0.756 | 0.015 |
| 280 | Praeruptorin D                                                     | 73069-28-0  | 0.910 | 0.011 | 0.915 | 0.008 |
| 281 | Praeruptorin A                                                     | 73069-27-9  | 0.738 | 0.041 | 0.821 | 0.003 |
| 282 | Epigoitrin                                                         | 1072-93-1   | 0.815 | 0.010 | 0.878 | 0.015 |
| 283 | Medicagol                                                          | 1983-72-8   | 0.835 | 0.011 | 0.865 | 0.008 |
| 284 | $\beta$ -sitosterol                                                | 64997-52-0  | 0.853 | 0.036 | 0.849 | 0.009 |
| 285 | Germacrone                                                         | 6902-91-6   | 0.967 | 0.013 | 0.925 | 0.011 |
| 286 | Mangiferin                                                         | 4773-96-0   | 0.820 | 0.011 | 0.815 | 0.004 |
| 287 | Arteannuin B                                                       | 50906-56-4  | 0.904 | 0.018 | 0.876 | 0.018 |
| 288 | Fukinanclide                                                       |             | 0.783 | 0.011 | 0.717 | 0.006 |
| 289 | Atractylenolide III                                                | 73030-71-4  | 0.870 | 0.011 | 0.853 | 0.030 |
| 290 | 7-Ethoxy-4-Methylcoumarin                                          | 87-05-8     | 0.576 | 0.004 | 0.541 | 0.014 |
| 291 | Alpinetin                                                          | 36052-37-6  | 0.940 | 0.017 | 0.846 | 0.019 |
| 292 | Alantolactone                                                      | 546-43-0    | 0.757 | 0.021 | 0.530 | 0.013 |
| 293 | 3',4'-Anhydrovinblastine                                           | 38390-45-3  | 0.814 | 0.011 | 0.854 | 0.016 |
| 294 | 1-(3-ethyl-5,5,8,8-tetramethyl-6,7-dihydronaphthalen-2-yl)ethanone | 88-29-9     | 0.912 | 0.018 | 0.925 | 0.011 |
| 295 | Vindoline                                                          | 2182-14-1   | 0.825 | 0.008 | 0.808 | 0.006 |
| 296 | Toosendanin                                                        | 58812-37-6  | 0.997 | 0.006 | 0.855 | 0.017 |
| 297 | Lycorenine                                                         | 477-19-0    | 0.826 | 0.013 | 0.872 | 0.014 |
| 298 | Esculentoside A                                                    | 65497-07-6  | 0.891 | 0.016 | 0.816 | 0.007 |
| 299 | Galangin                                                           | 548-83-4    | 4.313 | 5.064 | 0.532 | 0.015 |
| 300 | Kirenot                                                            | 52659-56-0  | 0.897 | 0.009 | 0.842 | 0.013 |
| 301 | Formononetin                                                       | 485-72-3    | 0.924 | 0.017 | 0.925 | 0.008 |
| 302 | 6-Hydroxyindole                                                    | 2380-86-1   | 0.873 | 0.008 | 0.883 | 0.013 |
| 303 | Bullatine B                                                        | 466-26-2    | 0.851 | 0.026 | 0.854 | 0.012 |
| 304 | Sanguinarine citrate                                               | 132210-34-5 | 0.934 | 0.007 | 0.832 | 0.002 |
| 305 | Praeruptorin E                                                     | 78478-28-1  | 0.752 | 0.040 | 0.637 | 0.002 |
| 306 | Paeoniflorin                                                       | 23180-57-6  | 0.878 | 0.016 | 0.850 | 0.011 |
| 307 | Scoparone                                                          | 120-08-1    | 0.880 | 0.018 | 0.815 | 0.002 |
| 308 | taraxerol acetate                                                  | 2189-80-2   | 0.857 | 0.021 | 0.877 | 0.005 |
| 309 | L-Stepholidine                                                     | 16562-13-3  | 0.817 | 0.029 | 0.716 | 0.010 |
| 310 | Perivine                                                           | 2673-40-7   | 0.858 | 0.042 | 0.924 | 0.012 |
| 311 | Ilexoside B                                                        | 108544-40-7 | 0.938 | 0.038 | 0.858 | 0.005 |
| 312 | Bornyl acetate                                                     | 76-49-3     | 0.835 | 0.004 | 0.816 | 0.006 |
| 313 | Neohesperidin                                                      | 13241-33-3  | 0.908 | 0.024 | 0.838 | 0.001 |
| 314 | Dihydrolycorine                                                    | 6271-21-2   | 0.614 | 0.016 | 0.719 | 0.013 |
| 315 | Tuberostemonine HClO4                                              |             | 0.980 | 0.023 | 0.873 | 0.013 |
| 316 | Lidamide Hydrochloride                                             | 65009-35-0  | 0.835 | 0.004 | 0.771 | 0.013 |
| 317 | Linderane                                                          | 13476-25-0  | 0.823 | 0.006 | 0.696 | 0.011 |
| 318 | Luteoloside                                                        | 5373-11-5   | 0.880 | 0.008 | 0.922 | 0.015 |
| 319 | Thermopsine                                                        | 486-90-8    | 0.638 | 0.035 | 0.534 | 0.013 |
| 320 | Rubusoside                                                         | 64849-39-4  | 0.849 | 0.010 | 0.879 | 0.016 |
| 321 | Poncirin                                                           | 14941-08-3  | 0.865 | 0.024 | 0.823 | 0.008 |
| 322 | Adicardin                                                          | 103529-94-8 | 0.810 | 0.010 | 0.835 | 0.004 |
| 323 | Gaultherin                                                         | 490-67-5    | 0.890 | 0.001 | 0.820 | 0.011 |
| 324 | 1,3-diacetoxy-4,6,12-tetradecatriene-8,10-diyne                    | 29576-66-7  | 0.963 | 0.022 | 0.928 | 0.002 |
| 325 | Praeruptorin C                                                     | 83382-71-2  | 0.929 | 0.011 | 0.880 | 0.004 |
| 326 | Picroside II                                                       | 39012-20-9  | 0.848 | 0.013 | 0.838 | 0.008 |
| 327 | Kaempferol-O-glucuronide                                           | 22688-78-4  | 0.958 | 0.013 | 0.949 | 0.005 |
| 328 | 2-Hydroxyeupatolide                                                | 72229-33-5  | 0.862 | 0.022 | 0.818 | 0.014 |
| 329 | Isobergapten                                                       | 482-48-4    | 0.901 | 0.016 | 0.909 | 0.011 |
| 330 | Vinblastine                                                        | 865-21-4    | 0.828 | 0.010 | 0.863 | 0.015 |
| 331 | Phytolaccagenin                                                    | 1802-12-6   | 0.919 | 0.016 | 0.869 | 0.018 |
| 332 | Atractylodinol                                                     | 61642-89-5  | 0.824 | 0.017 | 0.810 | 0.012 |
| 333 | Atractylodin                                                       | 55290-63-6  | 0.894 | 0.010 | 0.921 | 0.004 |
| 334 | Corynoxine                                                         | 6877-32-3   | 0.911 | 0.014 | 0.825 | 0.010 |
| 335 | Nerol                                                              | 106-25-2    | 0.906 | 0.004 | 0.939 | 0.008 |
| 336 | Biochanin A                                                        | 491-80-5    | 0.865 | 0.039 | 0.871 | 0.014 |
| 337 | Geraniol                                                           | 106-24-1    | 0.890 | 0.016 | 0.881 | 0.014 |
| 338 | p-Hydroxy-cinnamic acid                                            | 7400-08-0   | 0.859 | 0.021 | 0.830 | 0.012 |
| 339 | Anwuligan                                                          | 107534-93-0 | 0.949 | 0.013 | 0.907 | 0.005 |
| 340 | Arctigenin                                                         | 7770-78-7   | 0.888 | 0.013 | 0.829 | 0.009 |
| 341 | 3,29-Dibenzoyl karounitriol                                        | 873001-54-8 | 0.901 | 0.011 | 0.818 | 0.008 |
| 342 | Cornin                                                             | 548-37-8    | 0.864 | 0.019 | 0.723 | 0.016 |
| 343 | Isoverbascoside                                                    | 61303-13-7  | 0.863 | 0.004 | 0.831 | 0.012 |
| 344 | Costunolide                                                        | 553-21-9    | 0.850 | 0.015 | 0.817 | 0.006 |
| 345 | Peiminine                                                          | 18059-10-4  | 0.794 | 0.005 | 0.756 | 0.013 |
| 346 | Neohesperidin                                                      | 13241-33-3  | 0.825 | 0.021 | 0.815 | 0.004 |
| 347 | Shihulimonin A                                                     | 99026-99-0  | 0.807 | 0.004 | 0.842 | 0.007 |
| 348 | Linarin                                                            | 480-36-4    | 0.681 | 0.015 | 0.563 | 0.013 |
| 349 | Suberosin                                                          | 581-31-7    | 0.854 | 0.025 | 0.820 | 0.011 |
| 350 | Peimine                                                            | 23496-41-5  | 0.821 | 0.008 | 0.862 | 0.015 |
| 351 | 3,29-Dibenzoyl rarounitriol                                        | 873001-54-8 | 0.942 | 0.020 | 0.926 | 0.016 |
| 352 | Tangeretin                                                         | 481-53-8    | 0.911 | 0.044 | 0.865 | 0.011 |

|     |                           |             |       |       |       |       |
|-----|---------------------------|-------------|-------|-------|-------|-------|
| 353 | Tenuifolin                | 20183-47-5  | 0.847 | 0.016 | 0.871 | 0.014 |
| 354 | Darutigenol               | 5940-00-1   | 0.815 | 0.016 | 0.822 | 0.015 |
| 355 | Norisoboldine             | 23599-69-1  | 0.980 | 0.012 | 0.914 | 0.003 |
| 356 | Isopimpinellin            | 482-27-9    | 0.821 | 0.007 | 0.829 | 0.011 |
| 357 | Momordin Ic               | 96990-18-0  | 0.933 | 0.009 | 0.864 | 0.011 |
| 358 | Madecassoside             | 34540-22-2  | 0.850 | 0.009 | 0.724 | 0.004 |
| 359 | Scoparone                 | 120-08-1    | 0.960 | 0.011 | 0.973 | 0.067 |
| 360 | Coptisine chloride        | 6020-18-4   | 0.924 | 0.016 | 0.884 | 0.005 |
| 361 | Scoulerine                | 6451-72-5   | 0.669 | 0.005 | 0.720 | 0.005 |
| 362 | Curcumol                  | 4871-97-0   | 0.852 | 0.013 | 0.908 | 0.006 |
| 363 | Dendrobine                | 2115-91-5   | 0.885 | 0.008 | 0.882 | 0.021 |
| 364 | Crocini I                 | 42553-65-1  | 0.940 | 0.011 | 0.878 | 0.006 |
| 365 | Echinacoside              | 82854-37-3  | 0.820 | 0.016 | 0.813 | 0.006 |
| 366 | 4-Hydroxybenzeneacetamide | 17194-82-0  | 0.874 | 0.006 | 0.868 | 0.004 |
| 367 | Isocolumbin               | 471-545     | 0.885 | 0.008 | 0.809 | 0.001 |
| 368 | Isoline                   | 30000-36-3  | 0.959 | 0.006 | 0.926 | 0.006 |
| 369 | Nuezhenide                | 39011-92-2  | 0.847 | 0.035 | 0.779 | 0.014 |
| 370 | Ligucyperonol             | 105108-20-1 | 0.724 | 0.017 | 0.716 | 0.010 |
| 371 | Mesaconitine              | 2752-64-9   | 0.841 | 0.004 | 0.818 | 0.008 |
| 372 | Tilioside                 | 20316-62-5  | 0.892 | 0.013 | 0.868 | 0.021 |
| 373 | Hispidulin                | 1447-88-7   | 0.692 | 0.021 | 0.683 | 0.013 |
| 374 | Taraxerol                 |             | 0.833 | 0.008 | 0.811 | 0.001 |
| 375 | Liensinine HClO 4         |             | 0.923 | 0.006 | 0.866 | 0.010 |
| 376 | Sophoricoside             | 152-95-4    | 0.920 | 0.006 | 0.908 | 0.006 |
| 377 | Pimpinellin               | 131-12-4    | 0.843 | 0.006 | 0.874 | 0.010 |
| 378 | (-)-Perillaldehyde        | 18031-40-8  | 0.906 | 0.023 | 0.878 | 0.008 |
| 379 | Perillen                  | 539-52-6    | 0.906 | 0.004 | 0.896 | 0.005 |
| 380 | Neoeriocitrin             | 13241-32-2  | 0.837 | 0.020 | 0.880 | 0.004 |
| 381 | Astragaloside II          | 84676-89-1  | 0.881 | 0.015 | 0.891 | 0.001 |
| 382 | Crotaline                 | 315-22-0    | 0.841 | 0.011 | 0.819 | 0.003 |
| 383 | Aristolochic Acid A       | 313-67-7    | 0.836 | 0.028 | 0.822 | 0.012 |
| 384 | Naringin                  | 10236-47-2  | 0.910 | 0.024 | 0.864 | 0.011 |
| 385 | Syringin                  | 118-34-3    | 0.949 | 0.013 | 0.874 | 0.005 |
| 386 | Salvianic acid A sodium   | 23028-17-3  | 0.903 | 0.001 | 0.850 | 0.009 |
| 387 | Neohesperidin             | 13241-33-3  | 0.836 | 0.001 | 0.871 | 0.013 |
| 388 | Vinorelbine               | 71486-22-1  | 0.840 | 0.036 | 0.819 | 0.011 |
| 389 | Nitidine chloride         | 13063-04-2  | 0.924 | 0.017 | 0.853 | 0.020 |
| 390 | Calycosin                 | 20575-57-9  | 0.911 | 0.020 | 0.917 | 0.022 |
| 391 | Protodioscin              | 55056-80-9  | 0.891 | 0.015 | 0.830 | 0.018 |
| 392 | Potenline                 | 53956-04-0  | 0.919 | 0.014 | 0.922 | 0.015 |
| 393 | Vinblastine               | 865-21-4    | 0.860 | 0.032 | 0.853 | 0.012 |
| 394 | Daphnetin                 | 486-35-1    | 0.932 | 0.008 | 0.843 | 0.031 |
| 395 | Curculigoside             | 85643-19-2  | 0.833 | 0.008 | 0.817 | 0.005 |
| 396 | Palmitic acid             | 57-10-3     | 0.931 | 0.005 | 1.032 | 0.054 |
| 397 | 1-Deoxynojirimycin        | 19130-96-2  | 0.822 | 0.007 | 0.813 | 0.011 |
| 398 | Periplocoside             | 13137-64-9  | 0.951 | 0.007 | 0.924 | 0.012 |
| 399 | Podophyllotoxin           | 518-28-5    | 0.880 | 0.018 | 0.810 | 0.004 |
| 400 | 7-Ethylcamptothecin       | 78287-27-1  | 0.907 | 0.008 | 0.884 | 0.004 |
| 401 | Liensinine diperchlorate  | 2385-63-9   | 0.949 | 0.011 | 0.860 | 0.009 |
| 402 | Glycitin                  | 40246-10-4  | 0.984 | 0.011 | 0.870 | 0.004 |
| 403 | Rutin                     | 153-18-4    | 0.906 | 0.025 | 0.836 | 0.006 |
| 404 | Madecassoside             | 34540-22-2  | 0.857 | 0.042 | 0.861 | 0.013 |
| 405 | Echinacoside              | 82854-37-3  | 0.945 | 0.018 | 0.954 | 0.013 |
| 406 | Shikonin                  | 517-89-5    | 0.873 | 0.026 | 0.869 | 0.005 |
| 407 | Daidzin                   | 552-66-9    | 0.920 | 0.011 | 0.872 | 0.016 |
| 408 | Formononetin              | 485-72-3    | 0.828 | 0.012 | 0.868 | 0.035 |
| 409 | Psoralen                  | 66-97-7     | 0.807 | 0.008 | 0.763 | 0.016 |
| 410 | Cucurbitacin B            | 6199-67-3   | 0.858 | 0.006 | 0.863 | 0.013 |
| 411 | Narirutin                 | 14259-46-2  | 0.894 | 0.011 | 0.848 | 0.019 |
| 412 | Epimedin A                | 110623-72-8 | 0.880 | 0.010 | 0.832 | 0.025 |
| 413 | Epimedin B                | 110623-73-9 | 0.827 | 0.021 | 0.875 | 0.003 |
| 414 | Epimedin C                | 110642-44-9 | 0.988 | 0.008 | 1.000 | 0.029 |
| 415 | 6-Shogaol                 | 555-66-8    | 0.889 | 0.004 | 0.869 | 0.005 |
| 416 | Sarsasapogenin            | 82597-74-8  | 0.848 | 0.008 | 0.823 | 0.015 |
| 417 | Magnofflorine             | 2141-09-5   | 0.826 | 0.009 | 0.811 | 0.002 |
| 418 | Aconitine 3-acetate       | 77181-26-1  | 0.905 | 0.020 | 0.882 | 0.015 |
| 419 | Atractylenolide I         | 73069-13-3  | 0.785 | 0.012 | 0.808 | 0.004 |
| 420 | Tectoridin                | 611-40-5    | 0.516 | 0.023 | 0.567 | 0.019 |
| 421 | Buddleoside               | 480-36-4    | 0.887 | 0.008 | 0.717 | 0.006 |
| 422 | Licochalcone A            | 58749-22-7  | 0.841 | 0.016 | 0.852 | 0.012 |
| 423 | 10-Hydroxy camptothecin   | 19685-09-7  | 0.974 | 0.011 | 0.911 | 0.001 |
| 424 | Costunolide               | 19685-09-7  | 0.835 | 0.012 | 0.857 | 0.014 |
| 425 | Prim-O-glucosylcimifugin  | 80681-45-4  | 0.969 | 0.013 | 0.873 | 0.018 |
| 426 | Cycloastragenol           | 78574-94-4  | 0.816 | 0.005 | 0.846 | 0.019 |
| 427 | Betulinic acid            | 472-15-1    | 0.941 | 0.010 | 0.917 | 0.009 |
| 428 | Harpagoside               | 19210-12-9  | 0.916 | 0.013 | 0.922 | 0.014 |
| 429 | Vinorelbine               | 71486-22-1  | 0.849 | 0.025 | 0.831 | 0.004 |
| 430 | Forsythoside A            | 79916-77-1  | 0.909 | 0.018 | 0.920 | 0.018 |
| 431 | Synephrine                | 94-07-5     | 0.966 | 0.037 | 0.869 | 0.003 |
| 432 | Salvianolic acid B        | 115939-25-8 | 0.849 | 0.004 | 0.865 | 0.008 |
| 433 | Astragaloside III         | 84687-42-3  | 0.884 | 0.008 | 0.883 | 0.001 |
| 434 | Astragaloside I           | 84680-75-1  | 0.905 | 0.004 | 0.824 | 0.019 |
| 435 | Astragaloside II          | 84676-89-1  | 0.934 | 0.018 | 0.921 | 0.016 |
| 436 | Diosgenin glucoside       | 14144-06-0  | 0.923 | 0.019 | 0.910 | 0.011 |
| 437 | Isochlorogenic acid B     | 14534-61-3  | 0.801 | 0.032 | 0.808 | 0.006 |
| 438 | Isochlorogenic acid A     | 2450-53-5   | 0.976 | 0.019 | 0.941 | 0.008 |
| 439 | Sedanolid                 | 6415-59-4   | 0.871 | 0.009 | 0.864 | 0.010 |
| 440 | Atractylenolide II        | 73069-14-4  | 0.836 | 0.021 | 0.811 | 0.002 |
| 441 | Atractylenolide III       | 73030-71-4  | 0.821 | 0.016 | 0.807 | 0.006 |

|     |                              |             |       |       |       |       |
|-----|------------------------------|-------------|-------|-------|-------|-------|
| 442 | Isochlorogenic acid C        | 32451-88-0  | 0.956 | 0.006 | 0.871 | 0.016 |
| 443 | Aconitine                    | 302-27-2    | 0.830 | 0.011 | 0.829 | 0.019 |
| 444 | Nomilin                      | 1063-77-0   | 0.942 | 0.006 | 0.922 | 0.015 |
| 445 | Nobiletin                    | 478-01-3    | 0.863 | 0.011 | 0.848 | 0.006 |
| 446 | Synephrine                   | 94-07-5     | 0.832 | 0.006 | 0.877 | 0.014 |
| 447 | Eriocitrin                   | 13463-28-0  | 0.918 | 0.013 | 0.832 | 0.006 |
| 448 | Morin hydrate                | 480-16-0    | 0.825 | 0.016 | 0.770 | 0.018 |
| 449 | Biochanin A                  | 491-80-5    | 0.898 | 0.010 | 0.822 | 0.001 |
| 450 | Nuciferine                   | 475-83-2    | 0.888 | 0.006 | 0.875 | 0.011 |
| 451 | Prim-O-glucosylcimifugin     | 80681-45-4  | 0.943 | 0.025 | 0.841 | 0.004 |
| 452 | Alantolactone                | 546-43-0    | 0.927 | 0.022 | 0.889 | 0.008 |
| 453 | Isoalantolactone             | 470-17-7    | 0.831 | 0.005 | 0.827 | 0.008 |
| 454 | Nerol                        | 106-25-2    | 0.893 | 0.005 | 0.816 | 0.010 |
| 455 | Dehydroandrographolide       | 134418-28-3 | 0.915 | 0.020 | 0.921 | 0.025 |
| 456 | Matrine                      | 519-02-8    | 0.920 | 0.026 | 0.902 | 0.000 |
| 457 | Naringenin                   | 480-41-1    | 0.820 | 0.005 | 0.810 | 0.003 |
| 458 | Geniposide                   | 24512-63-8  | 0.902 | 0.014 | 0.907 | 0.016 |
| 459 | Wogonoside                   | 51059-44-0  | 0.917 | 0.009 | 0.843 | 0.028 |
| 460 | Berberine hydrochloride      | 6078-17-7   | 0.747 | 0.035 | 0.816 | 0.006 |
| 461 | jatrorrhizine                | 3621-38-3   | 0.828 | 0.015 | 0.832 | 0.000 |
| 462 | Wogonin                      | 632-85-9    | 0.816 | 0.019 | 0.810 | 0.004 |
| 463 | Oxymatrine                   | 16837-52-8  | 0.801 | 0.016 | 0.816 | 0.006 |
| 464 | Berberine                    | 2086-83-1   | 0.943 | 0.021 | 0.902 | 0.012 |
| 465 | Rhein                        | 478-43-3    | 0.830 | 0.010 | 0.808 | 0.007 |
| 466 | Diosgenin                    | 512-04-9    | 0.910 | 0.025 | 0.835 | 0.010 |
| 467 | Stachydrine hydrochloride    | 4136-37-2   | 0.862 | 0.016 | 0.822 | 0.008 |
| 468 | 8-Methoxypsoralen            | 298-81-7    | 0.822 | 0.008 | 0.818 | 0.007 |
| 469 | Evodiamine                   | 518-17-2    | 0.993 | 0.028 | 0.919 | 0.013 |
| 470 | Ursolic Acid                 | 77-52-1     | 0.835 | 0.004 | 0.822 | 0.014 |
| 471 | Lupeol                       | 545-47-1    | 0.912 | 0.018 | 0.877 | 0.016 |
| 472 | Berberine hydrochloride      | 633-65-8    | 0.840 | 0.009 | 0.821 | 0.016 |
| 473 | glycyrrhetic acid            | 471-53-4    | 0.719 | 0.025 | 0.787 | 0.008 |
| 474 | Notoginseng Leaf Triterpenes | 88105-29-7  | 0.882 | 0.013 | 0.916 | 0.013 |
| 475 | Ginseng Leaves Extract       |             | 0.974 | 0.025 | 0.905 | 0.006 |
| 476 | Resveratrol                  | 501-36-0    | 0.832 | 0.006 | 0.821 | 0.016 |
| 477 | Genistein                    | 446-72-0    | 0.916 | 0.013 | 0.870 | 0.011 |
| 478 | Ginsenoside Rg3              | 14197-60-5  | 0.888 | 0.006 | 0.872 | 0.013 |
| 479 | Emodin                       | 518-82-1    | 0.892 | 0.014 | 0.837 | 0.007 |
| 480 | Ginsenoside Rh1              | 63223-86-9  | 0.843 | 0.035 | 0.901 | 0.011 |
| 481 | Saikosaponin D               | 20874-52-6  | 0.911 | 0.008 | 0.822 | 0.009 |
| 482 | Schisandrol A                | 7432-28-2   | 0.895 | 0.018 | 0.844 | 0.006 |
| 483 | Ethyl ferulate               | 4046-02-0   | 0.864 | 0.037 | 0.851 | 0.002 |
| 484 | Ginsenoside Rg2              | 52286-74-5  | 0.853 | 0.009 | 0.821 | 0.013 |
| 485 | p-Hydroxy-cinnamic acid      | 7400-08-0   | 0.980 | 0.009 | 0.953 | 0.011 |
| 486 | Salvianolic acid B           | 115939-25-8 | 0.822 | 0.008 | 0.805 | 0.007 |
| 487 | Bakuchiol                    | 10309-37-2  | 0.915 | 0.008 | 0.923 | 0.013 |
| 488 | Morin hydrate                | 480-16-0    | 0.842 | 0.013 | 0.813 | 0.006 |
| 489 | Vanillin                     | 121-33-5    | 0.931 | 0.016 | 0.871 | 0.009 |
| 490 | Ginkgolide B                 | 15291-77-7  | 0.768 | 0.021 | 0.707 | 0.011 |
| 491 | Sophocarpine                 | 6483-15-4   | 0.908 | 0.024 | 0.828 | 0.024 |
| 492 | Rhamnose                     | 6155-35-7   | 0.859 | 0.004 | 0.833 | 0.004 |
| 493 | Sesamin                      | 607-80-7    | 0.929 | 0.011 | 0.828 | 0.006 |
| 494 | Theophylline                 | 58-55-9     | 0.815 | 0.024 | 0.672 | 0.010 |
| 495 | Schizandrin B                | 61281-37-6  | 0.671 | 0.011 | 0.707 | 0.008 |
| 496 | Notoginsenoside R1           | 80418-24-2  | 0.920 | 0.009 | 0.842 | 0.014 |
| 497 | Astilbin                     | 29838-67-3  | 0.830 | 0.024 | 0.826 | 0.031 |
| 498 | Diammonium glycyrrhizinate   | 79165-06-3  | 0.821 | 0.020 | 0.751 | 0.008 |
| 499 | Hyodeoxycholic acid          | 83-49-8     | 0.921 | 0.026 | 0.825 | 0.013 |
| 500 | Cyclovirobuxine D            | 860-79-7    | 1.005 | 0.023 | 0.931 | 0.008 |
| 501 | Hanfangichin B               | 436-77-1    | 0.908 | 0.022 | 0.829 | 0.004 |
| 502 | Muscone                      | 541-91-3    | 0.873 | 0.003 | 0.856 | 0.009 |
| 503 | Dihydroartemisinin           | 71939-50-9  | 0.830 | 0.010 | 0.814 | 0.018 |
| 504 | Ursodeoxycholic Acid         | 128-13-2    | 0.582 | 0.029 | 0.441 | 0.021 |
| 505 | Sennoside A                  | 81-27-6     | 0.865 | 0.031 | 0.818 | 0.008 |
| 506 | Compound K                   | 39262-14-1  | 0.943 | 0.005 | 0.882 | 0.013 |
| 507 | Nicotinic acid               | 59-67-6     | 0.978 | 0.016 | 0.913 | 0.006 |
| 508 | Ginsenoside Rc               | 11021-14-0  | 1.017 | 0.009 | 0.941 | 0.002 |
| 509 | Breviscapine                 | 116122-36-2 | 0.915 | 0.020 | 0.882 | 0.013 |
| 510 | Nicotinamide                 | 98-92-0     | 0.859 | 0.040 | 0.813 | 0.015 |
| 511 | Peiminine                    | 18059-10-4  | 0.760 | 0.011 | 0.690 | 0.013 |
| 512 | Aloin                        | 1415-73-2   | 0.669 | 0.029 | 0.542 | 0.015 |
| 513 | Cinnamic alcohol             | 104-54-1    | 0.909 | 0.009 | 0.837 | 0.006 |
| 514 | Cinnamic aldehyde            | 104-55-2    | 0.877 | 0.008 | 0.818 | 0.013 |
| 515 | Sodium ferulic               | 24276-84-4  | 0.782 | 0.016 | 0.676 | 0.019 |
| 516 | Isofraxidin                  | 486-21-5    | 0.912 | 0.013 | 0.852 | 0.006 |
| 517 | Psoralidin                   | 18642-23-4  | 0.726 | 0.016 | 0.552 | 0.004 |
| 518 | Ligustrazine                 | 1124-11-4   | 0.981 | 0.024 | 0.826 | 0.016 |
| 519 | p-Coumaric acid              | 501-98-4    | 0.975 | 0.010 | 0.882 | 0.008 |
| 520 | Hordenine                    | 539-15-1    | 0.929 | 0.015 | 0.831 | 0.008 |
| 521 | Swertiamarine                | 17388-39-5  | 0.889 | 0.003 | 0.823 | 0.006 |
| 522 | Peimine                      | 23496-41-5  | 0.848 | 0.020 | 0.862 | 0.008 |
| 523 | Ophiopogonin D               | 945619-74-9 | 0.461 | 0.015 | 0.330 | 0.001 |
| 524 | Esculin hydrate              | 531-75-9    | 0.850 | 0.004 | 0.836 | 0.005 |
| 525 | Artemether                   | 71963-77-4  | 0.898 | 0.013 | 0.867 | 0.006 |
| 526 | Chondroitin Sulfate          | 24967-93-9  | 0.728 | 0.010 | 0.507 | 0.064 |
| 527 | Arctiin                      | 20362-31-6  | 0.932 | 0.006 | 0.872 | 0.013 |
| 528 | Ginsenoside Rb3              | 68406-26-8  | 0.956 | 0.014 | 0.914 | 0.006 |
| 529 | Tectorigenin                 | 611-40-5    | 0.877 | 0.008 | 0.841 | 0.006 |
| 530 | Triptolide                   | 38748-32-2  | 0.898 | 0.013 | 0.892 | 0.004 |

|     |                       |             |       |       |       |       |
|-----|-----------------------|-------------|-------|-------|-------|-------|
| 531 | Tetrandrine           | 518-34-3    | 0.477 | 0.006 | 0.430 | 0.011 |
| 532 | Protopanaxatriol      | 34080-08-5  | 0.868 | 0.022 | 0.832 | 0.008 |
| 533 | Dihydromyricetin      | 27200-12-0  | 0.836 | 0.019 | 0.813 | 0.006 |
| 534 | Tetrahydropalmatine   | 6024-85-7   | 0.746 | 0.010 | 0.669 | 0.005 |
| 535 | Pseudoginsenoside RT5 | 98474-78-3  | 0.966 | 0.037 | 0.923 | 0.009 |
| 536 | Ginsenoside F1        | 53963-43-2  | 0.850 | 0.004 | 0.827 | 0.008 |
| 537 | Salicylic acid        | 69-72-7     | 0.839 | 0.011 | 0.820 | 0.010 |
| 538 | Caffeine              | 58-08-2     | 0.880 | 0.016 | 0.833 | 0.005 |
| 539 | Ginsenoside F2        | 62025-49-4  | 0.755 | 0.024 | 0.672 | 0.023 |
| 540 | Lipoic acid           | 62-46-4     | 0.691 | 0.017 | 0.673 | 0.023 |
| 541 | Lovastatin            | 75330-75-5  | 0.829 | 0.012 | 0.806 | 0.021 |
| 542 | Ginsenoside-Rb2       | 11021-13-9  | 0.792 | 0.014 | 0.668 | 0.015 |
| 543 | Betaine               | 107-43-7    | 0.496 | 0.023 | 0.356 | 0.023 |
| 544 | Lycopene              | 502-65-8    | 0.985 | 0.010 | 0.923 | 0.006 |
| 545 | Norcantharidin        | 5442-12-6   | 0.994 | 0.018 | 0.943 | 0.009 |
| 546 | Schisandrin C         | 61301-33-5  | 0.746 | 0.019 | 0.693 | 0.007 |
| 547 | Rhyncholophylline     | 76-66-4     | 0.888 | 0.008 | 0.816 | 0.006 |
| 548 | Amygdalin             | 29883-15-6  | 0.960 | 0.016 | 0.929 | 0.005 |
| 549 | Saikosaponin A        | 20736-09-8  | 0.945 | 0.018 | 0.841 | 0.006 |
| 550 | Tangeretin            | 481-53-8    | 0.563 | 0.028 | 0.438 | 0.009 |
| 551 | Raddeanin A           | 89412-79-3  | 0.921 | 0.012 | 0.889 | 0.003 |
| 552 | Cichoric acid         | 6537-80-0   | 0.928 | 0.013 | 0.859 | 0.018 |
| 553 | Salvianolic acid A    | 96574-01-5  | 0.887 | 0.006 | 0.847 | 0.013 |
| 554 | Chenodeoxycholic acid | 474-25-9    | 0.825 | 0.011 | 0.826 | 0.007 |
| 555 | Celastrol             | 34157-83-0  | 0.753 | 0.025 | 0.674 | 0.006 |
| 556 | Ginsenoside Rd        | 52705-93-8  | 0.840 | 0.004 | 0.819 | 0.013 |
| 557 | Schizandrin A         | 61281-38-7  | 0.968 | 0.012 | 0.918 | 0.007 |
| 558 | Asiatic acid          | 464-92-6    | 0.863 | 0.037 | 0.818 | 0.004 |
| 559 | Protopanaxadio        | 30636-90-9  | 0.985 | 0.012 | 0.887 | 0.007 |
| 560 | Taxifolin             | 480-18-2    | 0.807 | 0.008 | 0.719 | 0.008 |
| 561 | Ferulic acid          | 1135-24-6   | 0.780 | 0.013 | 0.709 | 0.011 |
| 562 | Asiaticoside          | 16830-15-2  | 0.959 | 0.006 | 0.869 | 0.018 |
| 563 | Liquiritin            | 551-15-5    | 0.946 | 0.022 | 0.929 | 0.011 |
| 564 | Polygalacic acid      | 1260-04-4   | 0.373 | 0.022 | 0.240 | 0.021 |
| 565 | Phillyrin             | 487-41-2    | 0.781 | 0.013 | 0.676 | 0.010 |
| 566 | Senegenin             | 2469-34-3   | 0.496 | 0.010 | 0.434 | 0.013 |
| 567 | 10-Gingerol           | 23513-15-7  | 0.783 | 0.013 | 0.689 | 0.008 |
| 568 | Loganin               | 18524-94-2  | 0.923 | 0.005 | 0.897 | 0.008 |
| 569 | Lobetyolin            | 136085-37-5 | 0.982 | 0.013 | 0.945 | 0.015 |
| 570 | Glycitein             | 40957-83-3  | 0.821 | 0.011 | 0.813 | 0.017 |
| 571 | 8-Gingerol            | 23513-08-8  | 0.696 | 0.009 | 0.630 | 0.013 |
| 572 | Gentiopicroside       | 20831-76-9  | 0.919 | 0.011 | 0.860 | 0.017 |
| 573 | Dihydrocapsaicin      | 19408-84-5  | 0.777 | 0.008 | 0.717 | 0.021 |
| 574 | Patchouli alcohol     | 5986-55-0   | 0.554 | 0.006 | 0.478 | 0.030 |
| 575 | schisandrol B         | 58546-54-6  | 0.974 | 0.025 | 0.907 | 0.021 |
| 576 | Ginkgolic Acid        | 20261-38-5  | 0.876 | 0.018 | 0.860 | 0.005 |
| 577 | Salidroside           | 10338-51-9  | 0.919 | 0.009 | 0.897 | 0.007 |
| 578 | Gypenoside            |             | 0.947 | 0.013 | 0.865 | 0.025 |
| 579 | Sodium Aescinate      | 20977-05-3  | 0.873 | 0.019 | 0.819 | 0.009 |
| 580 | Oleuropein            | 32619-42-4  | 0.943 | 0.008 | 0.903 | 0.015 |
| 581 | Isopsoralen           | 523-50-2    | 0.767 | 0.019 | 0.684 | 0.006 |
| 582 | 4-Isopropyltoluene    | 99-87-6     | 0.929 | 0.011 | 0.883 | 0.013 |
| 583 | Cytisine              | 485-35-8    | 1.013 | 0.001 | 0.983 | 0.022 |
| 584 | Scutellarin           | 27740-01-8  | 0.815 | 0.018 | 0.828 | 0.013 |
| 585 | Phlorizin             | 60-81-1     | 0.979 | 0.004 | 0.906 | 0.010 |
| 586 | Isoliquiritigenin     | 961-29-5    | 0.879 | 0.008 | 0.821 | 0.006 |
| 587 | Liquiritigenin        | 578-86-9    | 0.744 | 0.018 | 0.632 | 0.007 |
| 588 | Jujuboside A          | 55466-04-1  | 0.599 | 0.015 | 0.482 | 0.023 |
| 589 | Jujuboside B          | 55466-05-2  | 0.876 | 0.025 | 0.823 | 0.006 |
| 590 | Ginsenoside Ro        | 34367-04-9  | 0.910 | 0.011 | 0.886 | 0.018 |
| 591 | Polyphyllin I         | 50773-41-6  | 0.703 | 0.015 | 0.631 | 0.006 |
| 592 | Polyphyllin II        | 50773-42-7  | 0.940 | 0.054 | 0.916 | 0.021 |
| 593 | Polyphyllin VI        | 55916-51-3  | 0.653 | 0.023 | 0.543 | 0.005 |
| 594 | Polyphyllin VII       | 68124-04-9  | 0.943 | 0.021 | 0.895 | 0.009 |

**Table S2. Effect of Compounds on the CD8+ T-cell mediated cytotoxicity against MC38 tumor cells in the co-culture.**  
The values shown are the Relative viability (tumor cell viability of treated group)/(tumor cell viability of control group) from the volcano plot of Figure 1B ( $\log_2[\text{relative viability}] > 1$ ;  $p < 0.05$ ).

| NO. | Name                           | CAS         | Mean  | STDV  |
|-----|--------------------------------|-------------|-------|-------|
| 1   | 5-HTP                          | 56-69-9     | 1.890 | 0.030 |
| 2   | 2-Methoxycinnamic acid         | 6099-03-2   | 1.122 | 0.014 |
| 6   | Chelerythrine                  | 476-32-4    | 1.275 | 0.089 |
| 7   | 10-Deacetylbaocatin III        | 32981-86-5  | 0.928 | 0.052 |
| 8   | 4-Methylumbelliferone          | 90-33-5     | 1.345 | 0.007 |
| 9   | wolfogine                      |             | 1.247 | 0.137 |
| 10  | Punicalagin                    | 65995-63-3  | 1.835 | 0.077 |
| 12  | 20(R)-Protopanaxadiol          | 7755-01-3   | 1.217 | 0.137 |
| 18  | 6-Gingerol                     | 23513-14-6  | 0.857 | 0.091 |
| 19  | Methyl 2-naphthyl ether        | 93-04-9     | 1.138 | 0.022 |
| 20  | 4-Demethylepipodophyllotoxin   | 6559-91-7   | 0.981 | 0.006 |
| 21  | Cantharidin                    | 56-25-7     | 1.102 | 0.016 |
| 22  | ligucyeronol                   |             | 1.382 | 0.107 |
| 23  | 7-Ethyl-10-hydroxycamptothecin | 86639-52-3  | 0.978 | 0.034 |
| 25  | Pseudolaric acid-B             | 82508-31-4  | 1.077 | 0.063 |
| 26  | Methyl 3,4-dihydroxybenzoate   | 2150-43-8   | 1.701 | 0.016 |
| 28  | (-)-Epigallocatechin           | 970-74-1    | 0.863 | 0.040 |
| 31  | Ecdysterone                    | 5289-74-7   | 1.006 | 0.021 |
| 33  | 4-Methylesculetin              | 529-84-0    | 1.671 | 0.074 |
| 36  | Fraxinellone                   | 28808-62-0  | 1.711 | 0.085 |
| 38  | Ethyl 4-hydroxybenzoate        | 120-47-8    | 1.836 | 0.092 |
| 40  | Indigo                         | 482-89-3    | 1.218 | 0.008 |
| 41  | Allicin                        | 539-86-6    | 1.340 | 0.016 |
| 43  | Tanshinone I                   | 568-73-0    | 1.274 | 0.010 |
| 44  | Vincamine                      | 1617-90-9   | 0.978 | 0.062 |
| 45  | Cordycepin                     | 73-03-0     | 1.281 | 0.100 |
| 46  | Juniper camphor                | 53840-55-4  | 1.292 | 0.030 |
| 48  | Indirubin                      | 479-41-4    | 1.262 | 0.061 |
| 50  | Scopoletin                     | 92-61-5     | 1.497 | 0.037 |
| 51  | Diosmin                        | 520-27-4    | 1.246 | 0.035 |
| 53  | Mollugin                       | 55481-88-4  | 1.196 | 0.098 |
| 55  | Farrerol                       | 24211-30-1  | 1.162 | 0.042 |
| 56  | Halofuginone                   | 55837-20-2  | 1.224 | 0.016 |
| 58  | Salvianolic acid B             | 115939-25-8 | 0.989 | 0.060 |
| 61  | Febrifugine                    | 24159-07-7  | 1.286 | 0.100 |
| 64  | Stigmasterol                   | 68555-08-8  | 1.346 | 0.304 |
| 65  | Homoharringtonine              | 26833-87-4  | 1.157 | 0.074 |
| 66  | Geniposide                     | 24512-63-8  | 1.032 | 0.001 |
| 67  | Koumine                        | 1358-76-5   | 1.156 | 0.022 |
| 68  | Pachymic acid                  | 29070-92-6  | 0.900 | 0.053 |
| 69  | Catechin                       | 7295-85-4   | 1.150 | 0.011 |
| 70  | Pogostone                      | 23800-56-8  | 1.695 | 0.059 |
| 72  | Geniposidic acid               | 27741-01-1  | 1.026 | 0.019 |
| 73  | Thermopsine                    | 486-90-8    | 1.118 | 0.013 |
| 75  | Homovanillic acid              | 306-08-1    | 1.115 | 0.031 |
| 76  | Echinacoside                   | 82854-37-3  | 1.270 | 0.168 |
| 77  | Buxtauine                      | 4236-73-1   | 1.852 | 0.196 |
| 78  | Phellodendrine                 | 6873-13-18  | 0.958 | 0.057 |
| 79  | Methyl hesperidin              | 11013-97-1  | 0.707 | 0.041 |
| 80  | Galanthamine                   | 357-70-0    | 1.326 | 0.063 |
| 81  | Glabridin                      | 59870-68-7  | 1.601 | 0.197 |
| 82  | Palmatine                      | 3486-67-7   | 1.866 | 0.049 |
| 84  | P-Hydroxyphenyl butanone       | 5471-51-2   | 1.781 | 0.069 |
| 86  | Lappaconitine                  | 32854-75-4  | 1.596 | 0.049 |
| 87  | Phloretin                      | 60-82-2     | 1.521 | 0.141 |
| 88  | Dihydroguaiaretic acid         | 66322-34-7  | 1.465 | 0.078 |
| 90  | Xanthotoxol                    | 2009-24-7   | 1.705 | 0.078 |
| 94  | Pinocembrin                    | 480-39-7    | 1.846 | 0.091 |
| 95  | Sodium tauroursodeoxycholate   | 14605-22-2  | 0.881 | 0.013 |
| 96  | Rebaudioside A                 | 58543-16-1  | 1.691 | 0.028 |
| 97  | Icariine                       |             | 2.502 | 0.095 |
| 99  | Blinin                         | 125675-09-4 | 1.762 | 0.153 |
| 100 | Theobromine                    | 83-67-0     | 1.403 | 0.015 |
| 101 | Nepetalactone                  | 490-10-8    | 0.938 | 0.062 |
| 102 | Pinostrubin                    | 480-37-5    | 1.425 | 0.160 |



|     |                                      |             |       |       |
|-----|--------------------------------------|-------------|-------|-------|
| 104 | Oroxin B                             | 114482-86-9 | 1.371 | 0.071 |
| 105 | Calycosin-7-glucoside                | 20633-67-4  | 0.803 | 0.013 |
| 107 | Pomolic Acid                         | 13849-91-7  | 0.806 | 0.132 |
| 108 | Ergosterol                           | 57-87-4     | 1.161 | 0.045 |
| 113 | 5-Hydroxy-4-methoxycanthin-6-one     | 18110-86-6  | 0.616 | 0.078 |
| 115 | Acteoside                            | 61276-17-3  | 0.379 | 0.074 |
| 116 | Atractylenolide I                    | 73069-13-3  | 2.520 | 0.169 |
| 118 | Mogroside V                          | 88901-36-4  | 0.839 | 0.081 |
| 119 | Gallic acid                          | 149-91-7    | 1.102 | 0.043 |
| 121 | Erianin                              | 95041-90-0  | 1.069 | 0.054 |
| 122 | Friedelin                            | 559-74-0    | 1.622 | 0.175 |
| 124 | Lathyrol                             | 34420-19-4  | 1.002 | 0.043 |
| 125 | Taurochenodeoxycholic acid           | 516-35-8    | 1.888 | 0.135 |
| 127 | Guanosine                            | 118-00-3    | 1.127 | 0.091 |
| 129 | 1,8-Diacetoxy-3-carboxyanthraquinone | 13739-02-1  | 0.880 | 0.014 |
| 130 | Anhydroicaritin                      | 38226-86-7  | 0.794 | 0.930 |
| 132 | Aconitine                            | 302-27-2    | 0.811 | 0.030 |
| 133 | Bisdemethoxycurcumin                 | 33171-05-0  | 0.725 | 0.076 |
| 134 | Carabrone                            | 1748-81-8   | 1.175 | 0.078 |
| 135 | Gambogic acid                        | 2752-65-0   | 0.771 | 0.014 |
| 136 | Spinosin                             | 72063-39-9  | 0.551 | 0.170 |
| 137 | Orcinol glucoside                    | 21082-33-7  | 1.243 | 0.161 |
| 138 | Cimifugin                            | 37921-38-3  | 1.035 | 0.092 |
| 141 | Physalin L                           | 113146-74-0 | 1.150 | 0.240 |
| 142 | Stevioside                           | 57817-89-7  | 1.816 | 0.204 |
| 143 | Notoginsenoside Ft1                  | 80418-24-2  | 0.785 | 0.150 |
| 144 | Seabuckthorn flavone                 |             | 0.907 | 0.036 |
| 145 | Cephalomannine                       | 71610-00-9  | 1.385 | 0.205 |
| 146 | Phytolaccagenin                      | 1802-12-6   | 1.061 | 0.057 |
| 147 | Thymol                               | 89-83-8     | 1.161 | 0.198 |
| 148 | 10,11-Dimethoxystrychnine            | 357-57-3    | 0.993 | 0.136 |
| 149 | Harmine                              | 442-51-3    | 1.069 | 0.064 |
| 150 | Dicoumarol                           | 66-76-2     | 0.603 | 0.252 |
| 152 | Esculentoside A                      | 65497-07-6  | 1.025 | 0.011 |
| 153 | Asatone                              | 38451-63-7  | 1.933 | 0.057 |
| 155 | Darutoside                           | 59219-65-7  | 1.053 | 0.006 |
| 156 | Hematoxylin                          | 517-28-2    | 0.946 | 0.095 |
| 160 | Schisantherin A                      | 58546-56-8  | 1.444 | 0.076 |
| 161 | Lycodoline                           | 6900-92-1   | 1.015 | 0.024 |
| 162 | Specnuezhenide                       | 39011-92-2  | 1.070 | 0.042 |
| 163 | Amentoflavone                        | 1617-53-4   | 0.779 | 0.158 |
| 164 | Tenuifolin                           | 20183-47-5  | 0.632 | 0.368 |
| 165 | Aucubin                              | 479-98-1    | 1.285 | 0.064 |
| 166 | Genistin                             | 529-59-9    | 1.671 | 0.155 |
| 167 | Lycorine                             | 476-28-8    | 0.701 | 0.125 |
| 168 | Ellagic acid                         | 476-66-4    | 1.310 | 0.242 |
| 169 | Dehydrocostus lactone                | 477-43-0    | 1.326 | 0.092 |
| 172 | Daidzein                             | 486-66-8    | 1.096 | 0.062 |
| 173 | Genistein                            | 446-72-0    | 0.557 | 0.600 |
| 174 | Luteolin                             | 491-70-3    | 1.191 | 0.156 |
| 175 | Ginsenoside Re                       | 51542-56-4  | 0.964 | 0.102 |
| 176 | Apigenin                             | 520-36-5    | 0.498 | 0.559 |
| 179 | Curcumin                             | 458-37-7    | 1.153 | 0.005 |
| 180 | Sinomenine                           | 115-53-7    | 0.902 | 0.171 |
| 182 | Chlorogenic acid                     | 327-97-9    | 0.860 | 0.149 |
| 184 | Oleanic acid                         | 508-02-1    | 1.026 | 0.022 |
| 185 | Chrysin                              | 480-40-0    | 0.902 | 0.185 |
| 187 | Rutin                                | 153-18-4    | 1.036 | 0.078 |
| 190 | Physcion                             | 521-61-9    | 0.956 | 0.092 |
| 191 | Emodin                               | 518-82-1    | 1.077 | 0.135 |
| 192 | Curdione                             | 13657-68-6  | 0.980 | 0.025 |
| 193 | Quercetin                            | 6151-25-3   | 1.037 | 0.001 |
| 194 | Ginsenoside Rg3                      | 14197-60-5  | 0.832 | 0.086 |
| 195 | Ginsenoside Rg1                      | 22427-39-0  | 1.045 | 0.091 |
| 197 | Astragaloside A                      | 83207-58-3  | 1.286 | 0.133 |
| 198 | Honokiol                             | 35354-74-6  | 1.215 | 0.193 |
| 199 | Astragaloside II                     | 84676-89-1  | 1.417 | 0.050 |
| 201 | Imperatorin                          | 482-44-0    | 0.894 | 0.138 |
| 202 | Nodakenin                            | 495-31-8    | 0.945 | 0.076 |
| 203 | Pterostilbene                        | 537-42-8    | 1.194 | 0.059 |
| 204 | Glycyrrhetic acid                    | 471-53-4    | 1.251 | 0.170 |

|     |                                                                    |             |       |       |
|-----|--------------------------------------------------------------------|-------------|-------|-------|
| 206 | Piperine                                                           | 94-62-2     | 0.486 | 0.414 |
| 208 | Hyperoside                                                         | 482-36-0    | 0.890 | 0.153 |
| 209 | Kaempferol                                                         | 520-18-3    | 1.162 | 0.014 |
| 210 | Andrographolide                                                    | 5508-58-7   | 0.780 | 0.002 |
| 211 | Paeonol                                                            | 552-41-0    | 0.692 | 0.030 |
| 213 | Brucine                                                            | 57-24-9     | 1.275 | 0.136 |
| 214 | Tanshinone IIA                                                     | 568-72-9    | 1.089 | 0.082 |
| 215 | Bilobalide                                                         | 33570-04-6  | 0.831 | 0.057 |
| 216 | Puerarin                                                           | 3681-99-0   | 1.111 | 0.011 |
| 217 | Glycyrrhizic acid                                                  | 1405-86-3   | 0.835 | 0.080 |
| 219 | Sclareolide                                                        | 564-20-5    | 0.725 | 0.076 |
| 220 | Oxypeucedanin                                                      | 737-52-0    | 0.908 | 0.090 |
| 221 | Raceanisodamine                                                    | 134355-54-7 | 1.146 | 0.014 |
| 222 | Neosperidin dihydrochalcone                                        | 20702-77-6  | 1.782 | 0.155 |
| 223 | Catalpol                                                           | 2415-24-9   | 0.904 | 0.018 |
| 225 | Yohimbine                                                          | 146-48-5    | 1.040 | 0.011 |
| 226 | Securinine                                                         | 5610-40-2   | 1.825 | 0.017 |
| 227 | Isoferulic acid                                                    | 537-73-5    | 1.039 | 0.010 |
| 228 | Epmedin C                                                          | 110642-44-9 | 1.780 | 0.180 |
| 230 | Bengenin                                                           | 477-90-7    | 0.695 | 0.057 |
| 232 | L-abrine                                                           | 21339-55-9  | 1.166 | 0.202 |
| 233 | Emetine dihydrochloride                                            | 316-42-7    | 1.492 | 0.313 |
| 234 | Sesamol                                                            | 533-31-3    | 0.768 | 0.126 |
| 237 | Harmine hydrochloride                                              | 343-27-1    | 1.053 | 0.043 |
| 238 | D-Ephedrine hydrochloride                                          | 24221-86-1  | 1.039 | 0.022 |
| 239 | 6-Methoxyluteolin                                                  | 520-11-6    | 1.053 | 0.029 |
| 240 | Quinic acid                                                        | 77-95-2     | 1.056 | 0.047 |
| 241 | Skimmin                                                            | 93-39-0     | 1.028 | 0.006 |
| 243 | Astragalin                                                         | 480-10-4    | 1.689 | 0.131 |
| 244 | Acetyl-trans-resveratrol                                           | 42206-94-0  | 1.252 | 0.028 |
| 246 | Isorhynchophylline                                                 | 6859-01-4   | 0.672 | 0.126 |
| 247 | Sclareol                                                           | 515-03-7    | 0.559 | 0.159 |
| 248 | Typhaneoside                                                       | 104472-68-6 | 1.106 | 0.104 |
| 249 | Diosmetin                                                          | 520-34-3    | 0.907 | 0.036 |
| 250 | Ginkgolide C                                                       | 15291-76-6  | 1.435 | 0.065 |
| 251 | Osthole                                                            | 484-12-8    | 1.596 | 0.107 |
| 252 | D(-)-Salicin                                                       | 138-52-3    | 1.213 | 0.110 |
| 254 | Ginkgolide B                                                       | 15291-77-7  | 1.346 | 0.064 |
| 255 | Ginkgolide A                                                       | 15291-75-5  | 1.554 | 0.089 |
| 257 | Silibinin                                                          | 22888-70-6  | 1.146 | 0.104 |
| 259 | Gastrodin                                                          | 62499-27-8  | 1.195 | 0.150 |
| 260 | Arbutin                                                            | 497-76-7    | 1.052 | 0.022 |
| 261 | Dehydrocostus lactone                                              | 477-43-0    | 1.325 | 0.091 |
| 262 | Betulin                                                            | 473-98-3    | 1.509 | 0.223 |
| 263 | Cardamonin                                                         | 18956-16-6  | 1.381 | 0.499 |
| 264 | 2,3,5,4'-Tetrahydroxyl-diphenylethylene-2-O-beta-D-glucoside       | 82373-94-2  | 1.058 | 0.084 |
| 266 | Oroxylin A                                                         | 480-11-5    | 0.827 | 0.220 |
| 267 | Columbianadin                                                      | 5058-13-9   | 0.735 | 0.052 |
| 268 | Albiflorin                                                         | 39011-90-0  | 0.899 | 0.039 |
| 269 | Avicularin                                                         | 572-30-5    | 0.785 | 0.151 |
| 270 | Buxtauine                                                          | 4236-73-1   | 0.538 | 0.019 |
| 271 | MENISDAURIN                                                        | 67765-58-6  | 0.608 | 0.245 |
| 272 | Harmine                                                            | 442-51-3    | 1.136 | 0.001 |
| 273 | Lupeol                                                             | 545-47-1    | 1.159 | 0.187 |
| 274 | Shionone                                                           | 10376-48-4  | 1.219 | 0.264 |
| 276 | Isorhamnetin                                                       | 480-19-3    | 1.612 | 0.170 |
| 277 | Tetrahydropalmatine                                                | 2934-97-6   | 0.979 | 0.124 |
| 278 | Isopimpinellin                                                     | 482-27-9    | 1.677 | 0.063 |
| 280 | Praeruptorin D                                                     | 73069-28-0  | 1.104 | 0.096 |
| 282 | Epigoitrin                                                         | 1072-93-1   | 0.665 | 0.010 |
| 283 | Medicagol                                                          | 1983-72-8   | 1.547 | 0.175 |
| 284 | $\beta$ -sitosterol                                                | 64997-52-0  | 1.102 | 0.098 |
| 285 | Germacrone                                                         | 6902-91-6   | 1.090 | 0.011 |
| 286 | Mangiferin                                                         | 4773-96-0   | 1.331 | 0.085 |
| 287 | Arteannuin B                                                       | 50906-56-4  | 1.187 | 0.161 |
| 289 | Atractylenolide III                                                | 73030-71-4  | 1.527 | 0.195 |
| 291 | Alpinetin                                                          | 36052-37-6  | 0.902 | 0.115 |
| 293 | 3',4'-Anhydrovinblastine                                           | 38390-45-3  | 1.555 | 0.332 |
| 294 | 1-(3-ethyl-5,5,8,8-tetramethyl-6,7-dihydronaphthalen-2-yl)ethanone | 88-29-9     | 0.738 | 0.063 |
| 295 | Vindoline                                                          | 2182-14-1   | 1.455 | 0.207 |
| 296 | Toosendanin                                                        | 58812-37-6  | 1.918 | 0.192 |

|     |                                                 |             |       |       |
|-----|-------------------------------------------------|-------------|-------|-------|
| 297 | Lycorenine                                      | 477-19-0    | 1.034 | 0.018 |
| 298 | Esculentoside A                                 | 65497-07-6  | 0.476 | 0.573 |
| 300 | Kirenol                                         | 52659-56-0  | 0.921 | 0.144 |
| 301 | Formononetin                                    | 485-72-3    | 0.948 | 0.346 |
| 302 | 6-Hydroxyindole                                 | 2380-86-1   | 1.169 | 0.187 |
| 303 | Bullatine B                                     | 466-26-2    | 1.046 | 0.361 |
| 304 | Sanguinarine citrate                            | 132210-34-5 | 1.547 | 0.234 |
| 306 | Paeoniflorin                                    | 23180-57-6  | 0.636 | 0.205 |
| 307 | Scoparone                                       | 120-08-1    | 1.182 | 0.143 |
| 308 | taraxerol acetate                               | 2189-80-2   | 1.022 | 0.021 |
| 310 | Perivine                                        | 2673-40-7   | 1.023 | 0.003 |
| 311 | Ilexoside B                                     | 108544-40-7 | 1.032 | 0.006 |
| 312 | Bornyl acetate                                  | 76-49-3     | 1.510 | 0.171 |
| 313 | Neohesperidin                                   | 13241-33-3  | 1.027 | 0.149 |
| 315 | Tuberostemonine HClO <sub>4</sub>               |             | 1.263 | 0.107 |
| 318 | Luteoloside                                     | 5373-11-5   | 1.320 | 0.195 |
| 320 | Rubusoside                                      | 64849-39-4  | 1.213 | 0.163 |
| 321 | Poncirin                                        | 14941-08-3  | 1.168 | 0.161 |
| 322 | Adicardin                                       | 103529-94-8 | 1.656 | 0.175 |
| 323 | Gaultherin                                      | 490-67-5    | 1.015 | 0.166 |
| 324 | 1,3-diacetoxy-4,6,12-tetradecatriene-8,10-diyne | 29576-66-7  | 1.247 | 0.175 |
| 325 | Praeruptorin C                                  | 83382-71-2  | 1.037 | 0.106 |
| 326 | Picroside II                                    | 39012-20-9  | 1.459 | 0.146 |
| 327 | Kaempferol-O-glucuronide                        | 22688-78-4  | 1.682 | 0.142 |
| 328 | 2-Hydroxyeupatolide                             | 72229-33-5  | 1.842 | 0.112 |
| 329 | Isobergapten                                    | 482-48-4    | 1.138 | 0.050 |
| 330 | Vinblastine                                     | 865-21-4    | 1.040 | 0.059 |
| 331 | Phytolaccagenin                                 | 1802-12-6   | 1.477 | 0.120 |
| 332 | Atractylodinol                                  | 61642-89-5  | 1.338 | 0.132 |
| 333 | Atractylodin                                    | 55290-63-6  | 1.297 | 0.081 |
| 334 | Corynoxine                                      | 6877-32-3   | 0.775 | 0.002 |
| 335 | Nerol                                           | 106-25-2    | 1.418 | 0.093 |
| 336 | Biochanin A                                     | 491-80-5    | 2.154 | 0.089 |
| 337 | Geraniol                                        | 106-24-1    | 1.135 | 0.016 |
| 338 | p-Hydroxy-cinnamic acid                         | 7400-08-0   | 0.922 | 0.099 |
| 339 | Anwuligan                                       | 107534-93-0 | 1.121 | 0.006 |
| 340 | Arctigenin                                      | 7770-78-7   | 1.053 | 0.030 |
| 341 | 3,29-Dibenzoyl karounitriol                     | 873001-54-8 | 1.003 | 0.017 |
| 343 | Isoverbascoside                                 | 61303-13-7  | 0.892 | 0.015 |
| 344 | Costunolide                                     | 553-21-9    | 1.403 | 0.170 |
| 346 | Neohesperidin                                   | 13241-33-3  | 1.090 | 0.124 |
| 347 | Shihulimonin A                                  | 99026-99-0  | 1.064 | 0.078 |
| 349 | Suberosin                                       | 581-31-7    | 1.614 | 0.082 |
| 350 | Peimine                                         | 23496-41-5  | 1.152 | 0.021 |
| 351 | 3,29-Dibenzoyl rarounitriol                     | 873001-54-8 | 1.105 | 0.018 |
| 352 | Tangeretin                                      | 481-53-8    | 1.088 | 0.075 |
| 353 | Tenuifolin                                      | 20183-47-5  | 1.160 | 0.061 |
| 354 | Darutigenol                                     | 5940-00-1   | 1.050 | 0.031 |
| 355 | Norisoboldine                                   | 23599-69-1  | 1.035 | 0.015 |
| 356 | Isopimpinellin                                  | 482-27-9    | 0.945 | 0.103 |
| 357 | Momordin Ic                                     | 96990-18-0  | 1.019 | 0.024 |
| 359 | Scoparone                                       | 120-08-1    | 1.029 | 0.031 |
| 360 | Coptisine chloride                              | 6020-18-4   | 1.131 | 0.008 |
| 362 | Curcumol                                        | 4871-97-0   | 1.017 | 0.013 |
| 363 | Dendrobine                                      | 2115-91-5   | 1.032 | 0.022 |
| 364 | Crocin I                                        | 42553-65-1  | 1.047 | 0.022 |
| 365 | Echinacoside                                    | 82854-37-3  | 1.069 | 0.068 |
| 366 | 4-Hydroxybenzeneacetamide                       | 17194-82-0  | 1.037 | 0.035 |
| 367 | Isocolumbin                                     | 471-545     | 0.904 | 0.045 |
| 368 | Isoline                                         | 30000-36-3  | 1.187 | 0.078 |
| 371 | Mesaconitine                                    | 2752-64-9   | 0.915 | 0.024 |
| 372 | Tilliroside                                     | 20316-62-5  | 1.010 | 0.016 |
| 374 | Taraxerol                                       |             | 1.060 | 0.033 |
| 375 | Liensinine HClO <sub>4</sub>                    |             | 1.163 | 0.013 |
| 376 | Sophoricoside                                   | 152-95-4    | 1.752 | 0.170 |
| 377 | Pimpinellin                                     | 131-12-4    | 0.942 | 0.021 |
| 378 | (-)-Perillaldehyde                              | 18031-40-8  | 1.188 | 0.045 |
| 379 | Perillen                                        | 539-52-6    | 1.187 | 0.021 |
| 380 | Neoeriocitrin                                   | 13241-32-2  | 1.014 | 0.045 |
| 381 | Astragaloside II                                | 84676-89-1  | 1.286 | 0.146 |
| 382 | Crotaline                                       | 315-22-0    | 1.062 | 0.023 |

|     |                          |             |       |       |
|-----|--------------------------|-------------|-------|-------|
| 383 | Aristolochic Acid A      | 313-67-7    | 1.102 | 0.016 |
| 384 | Naringin                 | 10236-47-2  | 1.035 | 0.008 |
| 385 | Syringin                 | 118-34-3    | 1.150 | 0.047 |
| 386 | Salvianic acid A sodium  | 23028-17-3  | 1.247 | 0.105 |
| 387 | Neohesperidin            | 13241-33-3  | 1.227 | 0.063 |
| 388 | Vinorelbine              | 71486-22-1  | 1.059 | 0.043 |
| 389 | Nitidine chloride        | 13063-04-2  | 1.051 | 0.008 |
| 390 | Calycosin                | 20575-57-9  | 0.974 | 0.061 |
| 391 | Protodioscin             | 55056-80-9  | 1.098 | 0.038 |
| 392 | Potenline                | 53956-04-0  | 1.013 | 0.014 |
| 393 | Vinblastine              | 865-21-4    | 0.965 | 0.047 |
| 394 | Daphnetin                | 486-35-1    | 1.145 | 0.105 |
| 395 | Curculigoside            | 85643-19-2  | 1.622 | 0.226 |
| 396 | Palmitic acid            | 57-10-3     | 1.157 | 0.105 |
| 397 | 1-Deoxynojirimycin       | 19130-96-2  | 1.086 | 0.053 |
| 398 | Periplocoside            | 13137-64-9  | 1.037 | 0.049 |
| 399 | Podophyllotoxin          | 518-28-5    | 1.045 | 0.006 |
| 400 | 7-Ethylcamptothecin      | 78287-27-1  | 1.414 | 0.202 |
| 401 | Liensinine diperchlorate | 2385-63-9   | 1.210 | 0.100 |
| 402 | Glycitin                 | 40246-10-4  | 0.890 | 0.008 |
| 403 | Rutin                    | 153-18-4    | 1.039 | 0.022 |
| 404 | Madecassoside            | 34540-22-2  | 1.046 | 0.037 |
| 405 | Echinacoside             | 82854-37-3  | 1.381 | 0.129 |
| 406 | Shikonin                 | 517-89-5    | 0.929 | 0.015 |
| 407 | Daidzin                  | 552-66-9    | 1.581 | 0.356 |
| 408 | Formononetin             | 485-72-3    | 0.838 | 0.078 |
| 410 | Cucurbitacin B           | 6199-67-3   | 1.038 | 0.010 |
| 411 | Narirutin                | 14259-46-2  | 1.011 | 0.018 |
| 412 | Epimedin A               | 110623-72-8 | 1.384 | 0.084 |
| 413 | Epimedin B               | 110623-73-9 | 1.078 | 0.008 |
| 414 | Epimedin C               | 110642-44-9 | 1.101 | 0.025 |
| 415 | 6-Shogaol                | 555-66-8    | 1.262 | 0.083 |
| 416 | Sarsasapogenin           | 82597-74-8  | 1.112 | 0.128 |
| 417 | Magnoflorine             | 2141-09-5   | 1.165 | 0.054 |
| 418 | Aconitine 3-acetate      | 77181-26-1  | 1.105 | 0.081 |
| 422 | Licochalcone A           | 58749-22-7  | 1.103 | 0.051 |
| 423 | 10-Hydroxy camptothecin  | 19685-09-7  | 1.032 | 0.006 |
| 424 | Costunolide              | 19685-09-7  | 1.070 | 0.124 |
| 425 | Prim-O-glucosylcimifugin | 80681-45-4  | 1.033 | 0.008 |
| 426 | Cycloastragenol          | 78574-94-4  | 0.930 | 0.068 |
| 427 | Betulinic acid           | 472-15-1    | 1.028 | 0.078 |
| 428 | Harpagoside              | 19210-12-9  | 1.185 | 0.123 |
| 429 | Vinorelbine              | 71486-22-1  | 1.014 | 0.013 |
| 430 | Forsythoside A           | 79916-77-1  | 1.076 | 0.040 |
| 431 | Synephrine               | 94-07-5     | 1.252 | 0.112 |
| 432 | Salvianolic acid B       | 115939-25-8 | 1.207 | 0.071 |
| 433 | Astragaloside III        | 84687-42-3  | 1.044 | 0.008 |
| 434 | Astragaloside I          | 84680-75-1  | 1.057 | 0.045 |
| 435 | Astragaloside II         | 84676-89-1  | 1.198 | 0.114 |
| 436 | Diosgenin glucoside      | 14144-06-0  | 1.491 | 0.087 |
| 437 | Isochlorogenic acid B    | 14534-61-3  | 1.006 | 0.045 |
| 438 | Isochlorogenic acid A    | 2450-53-5   | 1.424 | 0.143 |
| 439 | Sedanolide               | 6415-59-4   | 1.067 | 0.028 |
| 440 | Atractylenolide II       | 73069-14-4  | 0.968 | 0.042 |
| 441 | Atractylenolide III      | 73030-71-4  | 1.082 | 0.077 |
| 442 | Isochlorogenic acid C    | 32451-88-0  | 1.043 | 0.065 |
| 443 | Aconitine                | 302-27-2    | 1.023 | 0.021 |
| 444 | Nomilin                  | 1063-77-0   | 1.076 | 0.055 |
| 445 | Nobiletin                | 478-01-3    | 1.505 | 0.095 |
| 446 | Synephrine               | 94-07-5     | 1.238 | 0.091 |
| 447 | Eriocitrin               | 13463-28-0  | 1.156 | 0.072 |
| 449 | Biochanin A              | 491-80-5    | 1.026 | 0.028 |
| 450 | Nuciferine               | 475-83-2    | 1.066 | 0.052 |
| 451 | Prim-O-glucosylcimifugin | 80681-45-4  | 1.056 | 0.024 |
| 452 | Alantolactone            | 546-43-0    | 1.305 | 0.074 |
| 453 | Isoalantolactone         | 470-17-7    | 1.043 | 0.006 |
| 454 | Nerol                    | 106-25-2    | 0.990 | 0.016 |
| 455 | Dehydroandrographolide   | 134418-28-3 | 1.407 | 0.049 |
| 456 | Matrine                  | 519-02-8    | 1.068 | 0.047 |
| 457 | Naringenin               | 480-41-1    | 1.025 | 0.011 |
| 458 | Geniposide               | 24512-63-8  | 1.146 | 0.013 |

|     |                              |             |       |       |
|-----|------------------------------|-------------|-------|-------|
| 459 | Wogonoside                   | 51059-44-0  | 1.117 | 0.011 |
| 461 | jatrorrhizine                | 3621-38-3   | 0.991 | 0.062 |
| 462 | Wogonin                      | 632-85-9    | 1.085 | 0.039 |
| 463 | Oxymatrine                   | 16837-52-8  | 1.037 | 0.077 |
| 464 | Berberine                    | 2086-83-1   | 1.040 | 0.024 |
| 465 | Rhein                        | 478-43-3    | 1.044 | 0.052 |
| 466 | Diosgenin                    | 512-04-9    | 0.952 | 0.133 |
| 467 | Stachydrine hydrochloride    | 4136-37-2   | 1.152 | 0.028 |
| 468 | 8-Methoxypsoralen            | 298-81-7    | 1.053 | 0.008 |
| 469 | Evodiamine                   | 518-17-2    | 0.932 | 0.057 |
| 470 | Ursolic Acid                 | 77-52-1     | 1.119 | 0.019 |
| 471 | Lupeol                       | 545-47-1    | 1.097 | 0.014 |
| 472 | Berberine hydrochloride      | 633-65-8    | 1.392 | 0.047 |
| 474 | Notoginseng Leaf Triterpenes | 88105-29-7  | 1.065 | 0.038 |
| 475 | Ginseng Leaves Extract       |             | 1.038 | 0.016 |
| 476 | Resveratrol                  | 501-36-0    | 1.402 | 0.028 |
| 477 | Genistein                    | 446-72-0    | 1.037 | 0.007 |
| 478 | Ginsenoside Rg3              | 14197-60-5  | 1.324 | 0.206 |
| 479 | Emodin                       | 518-82-1    | 1.442 | 0.071 |
| 480 | Ginsenoside Rh1              | 63223-86-9  | 1.188 | 0.086 |
| 481 | Saikosaponin D               | 20874-52-6  | 0.815 | 0.117 |
| 482 | Schisandrol A                | 7432-28-2   | 1.280 | 0.074 |
| 483 | Ethyl ferulate               | 4046-02-0   | 1.491 | 0.064 |
| 484 | Ginsenoside Rg2              | 52286-74-5  | 1.168 | 0.072 |
| 485 | p-Hydroxy-cinnamic acid      | 7400-08-0   | 1.017 | 0.078 |
| 486 | Salvianolic acid B           | 115939-25-8 | 1.068 | 0.083 |
| 487 | Bakuchiol                    | 10309-37-2  | 1.193 | 0.078 |
| 488 | Morin hydrate                | 480-16-0    | 0.970 | 0.029 |
| 489 | Vanillin                     | 121-33-5    | 1.763 | 0.141 |
| 491 | Sophocarpine                 | 6483-15-4   | 1.365 | 0.125 |
| 492 | Rhamnose                     | 6155-35-7   | 0.945 | 0.037 |
| 493 | sesamin                      | 607-80-7    | 1.234 | 0.204 |
| 496 | Notoginsenoside R1           | 80418-24-2  | 1.038 | 0.001 |
| 497 | Astilbin                     | 29838-67-3  | 1.395 | 0.090 |
| 499 | Hyodeoxycholic acid          | 83-49-8     | 1.053 | 0.051 |
| 500 | Cyclovirobuxine D            | 860-79-7    | 1.023 | 0.028 |
| 501 | Hanfangichin B               | 436-77-1    | 1.077 | 0.054 |
| 502 | Muscone                      | 541-91-3    | 1.019 | 0.019 |
| 503 | Dihydroartemisinin           | 71939-50-9  | 1.164 | 0.013 |
| 505 | Sennoside A                  | 81-27-6     | 1.169 | 0.042 |
| 506 | Compound K                   | 39262-14-1  | 1.141 | 0.045 |
| 507 | Nicotinic acid               | 59-67-6     | 1.056 | 0.033 |
| 508 | Ginsenoside Rc               | 11021-14-0  | 1.108 | 0.041 |
| 509 | Brevi-scapi-ne               | 116122-36-2 | 1.349 | 0.174 |
| 510 | Nicotinamide                 | 98-92-0     | 1.129 | 0.023 |
| 513 | Cinnamic alcohol             | 104-54-1    | 0.981 | 0.034 |
| 514 | Cinnamic aldehyde            | 104-55-2    | 1.191 | 0.076 |
| 516 | Isofraxidin                  | 486-21-5    | 1.133 | 0.026 |
| 518 | Ligustrazine                 | 1124-11-4   | 1.185 | 0.122 |
| 519 | p-Coumaric acid              | 501-98-4    | 1.114 | 0.059 |
| 520 | Horde-nine                   | 539-15-1    | 1.481 | 0.074 |
| 521 | Swertiamarine                | 17388-39-5  | 0.987 | 0.023 |
| 522 | Peimine                      | 23496-41-5  | 1.162 | 0.015 |
| 524 | Esculin hydrate              | 531-75-9    | 1.091 | 0.069 |
| 525 | Artemether                   | 71963-77-4  | 1.110 | 0.025 |
| 527 | Arctiin                      | 20362-31-6  | 1.494 | 0.030 |
| 528 | Ginsenoside Rb3              | 68406-26-8  | 1.048 | 0.013 |
| 529 | Tectorigenin                 | 611-40-5    | 1.152 | 0.041 |
| 530 | Triptolide                   | 38748-32-2  | 1.365 | 0.008 |
| 532 | Protopanaxatriol             | 34080-08-5  | 1.052 | 0.028 |
| 533 | Dihydromyricetin             | 27200-12-0  | 1.100 | 0.025 |
| 535 | Pseudoginsenoside RT5        | 98474-78-3  | 1.014 | 0.022 |
| 536 | Ginsenoside F1               | 53963-43-2  | 1.034 | 0.031 |
| 537 | Salicylic acid               | 69-72-7     | 1.220 | 0.100 |
| 538 | Caffeine                     | 58-08-2     | 1.218 | 0.054 |
| 541 | Lovastatin                   | 75330-75-5  | 0.960 | 0.032 |
| 544 | Lycopene                     | 502-65-8    | 1.022 | 0.079 |
| 545 | Norcantharidin               | 5442-12-6   | 1.510 | 0.068 |
| 547 | Rhyncholphylline             | 76-66-4     | 1.144 | 0.007 |
| 548 | Amygdalin                    | 29883-15-6  | 1.029 | 0.070 |
| 549 | Saikosaponin A               | 20736-09-8  | 1.167 | 0.057 |

|                           |             |       |       |
|---------------------------|-------------|-------|-------|
| 551 Raddeanin A           | 89412-79-3  | 1.451 | 0.133 |
| 552 Cichoric acid         | 6537-80-0   | 1.055 | 0.034 |
| 553 Salvianolic acid A    | 96574-01-5  | 1.139 | 0.011 |
| 554 Chenodeoxycholic acid | 474-25-9    | 1.101 | 0.087 |
| 556 Ginsenoside Rd        | 52705-93-8  | 1.235 | 0.043 |
| 557 Schizandrin A         | 61281-38-7  | 1.538 | 0.122 |
| 558 Asiatic acid          | 464-92-6    | 1.135 | 0.089 |
| 559 Protopanaxadio        | 30636-90-9  | 1.077 | 0.072 |
| 562 Asiaticoside          | 16830-15-2  | 1.096 | 0.033 |
| 563 Liquiritin            | 551-15-5    | 0.904 | 0.035 |
| 568 Loganin               | 18524-94-2  | 1.237 | 0.076 |
| 569 Lobetyolin            | 136085-37-5 | 1.113 | 0.006 |
| 570 Glycitein             | 40957-83-3  | 1.305 | 0.081 |
| 572 Gentiopicroside       | 20831-76-9  | 0.993 | 0.019 |
| 575 schisandrol B         | 58546-54-6  | 1.229 | 0.004 |
| 576 Ginkgolic Acid        | 20261-38-5  | 1.080 | 0.011 |
| 577 Salidroside           | 10338-51-9  | 1.081 | 0.030 |
| 578 Gypenoside            |             | 1.187 | 0.020 |
| 579 Sodium Aescinate      | 20977-05-3  | 1.246 | 0.066 |
| 580 Oleuropein            | 32619-42-4  | 1.025 | 0.010 |
| 582 4-Isopropyltoluene    | 99-87-6     | 1.166 | 0.039 |
| 583 Cytisine              | 485-35-8    | 1.122 | 0.049 |
| 584 Scutellarin           | 27740-01-8  | 1.029 | 0.013 |
| 585 Phlorizin             | 60-81-1     | 1.255 | 0.023 |
| 586 Isoliquiritigenin     | 961-29-5    | 1.169 | 0.033 |
| 589 Jujuboside B          | 55466-05-2  | 1.080 | 0.017 |
| 590 Ginsenoside Ro        | 34367-04-9  | 1.186 | 0.021 |
| 592 Polyphyllin II        | 50773-42-7  | 0.994 | 0.038 |
| 594 Polyphyllin VII       | 68124-04-9  | 1.022 | 0.011 |

**Table S3. The panel of antibodies for CyTOF assay.**

| <b>Marker</b> | <b>Clone</b> | <b>Tag</b> | <b>Ab Dilution</b> |
|---------------|--------------|------------|--------------------|
| CD45          | 30- F11      | 89Y        | 200                |
| I-A/I-E       | M5/114.15.2  | 209Bi      | 100                |
| CD274/PD-L1   | 10F.9G2      | 153Eu      | 200                |
| CD3e          | 145-2C11     | 152Sm      | 200                |
| CD8a          | 53-6.7       | 146Nd      | 100                |
| CD25          | 3C7          | 150Nd      | 200                |
| CD127/IL7Ra   | A7R34        | 175Lu      | 100                |
| CD62L         | MEL-14       | 160Gd      | 300                |
| CD69          | H1.2F3       | 145Nd      | 100                |
| TCRb          | H57-597      | 143Nd      | 100                |
| CD44          | IM7          | 171Yb      | 250                |
| CD11b         | M1/70        | 148Nd      | 300                |
| CD11c         | N418         | 142Nd      | 100                |
| F4/80         | BM8          | 159Tb      | 200                |
| Ly-6C         | HK1.4        | 162Dy      | 250                |
| Ly-6G         | 1A8          | 141Pr      | 100                |
| NK1.1         | PK136        | 170Er      | 100                |
| CD45R/ B220   | RA3-6B2      | 176Yb      | 100                |
| CD19          | 6D5          | 149Sm      | 100                |
| TER-119       | TER-119      | 154Sm      | 200                |
| EpCAM         | G8.8         | 166Er      | 200                |
| Vimentin      | RV202        | 156Gd      | 200                |
| CCR7          | 4B12         | 164Dy      | 200                |
| Sca-1         | D7           | 169Tm      | 200                |
| CD4           | RM4-5        | 172Yb      | 100                |
| Foxp3         | FJK-16s      | 165Ho      | 200                |

**Table S4. Clinical information of human colorectal cancer samples.**

| Case | Sex | age | Surgery                         | Diagnosis                       |
|------|-----|-----|---------------------------------|---------------------------------|
| 1    | F   | 63  | Lower anterior resection        | Sigmoid colon adenocarcinoma    |
| 2    | M   | 52  | Colectomy                       | Adenocarcinoma                  |
| 3    | F   | 42  | Colectomy                       | Adenocarcinoma                  |
| 4    | F   | 58  | Hepatectomy                     | Metastatic colon adenocarcinoma |
| 5    | M   | 61  | Sectionectomy                   | Metastatic rectal cancer        |
| 6    | M   | 61  | Ileocolic and sigmoid resection | Adenocarcinoma                  |
| 7    | M   | 63  | Colectomy                       | Adenocarcinoma                  |
| 8    | F   | 67  | Small bowel resection           | Adenocarcinoma                  |



**Table S5. Parsing of peptides for quantification.**

|                                                                                                                                | <i>C (Control)</i><br><i>Prep1</i> | <i>C (Control)</i><br><i>Prep2</i> | <i>T (Treated)</i><br><i>Prep1</i> | <i>T (Treated)</i><br><i>Prep2</i> |
|--------------------------------------------------------------------------------------------------------------------------------|------------------------------------|------------------------------------|------------------------------------|------------------------------------|
| # of peptides identified with an assigned protein name and a PEP value $\leq 0.05$                                             | 33,358                             | 26,959                             | 37,018                             | 28,754                             |
| <b>Notes:</b>                                                                                                                  |                                    |                                    |                                    |                                    |
| 1) PEP = Posterior Error Probability, thus 95% probability carrying PSMs were isolated                                         |                                    |                                    |                                    |                                    |
| 2) PSM = Peptide Spectral Matches                                                                                              |                                    |                                    |                                    |                                    |
| # of peptides identified with a unique sequence for a protein                                                                  | 16,015                             | 13,053                             | 17,943                             | 14,118                             |
| <b>Notes:</b>                                                                                                                  |                                    |                                    |                                    |                                    |
| 1) Some identified peptide sequences are common in multiple proteins, thus for quantification purposes, such PSMs are excluded |                                    |                                    |                                    |                                    |
| # of proteins identified without contaminant peptide identifications                                                           | 2613                               | 2204                               | 2740                               | 2380                               |
| <b>Notes:</b>                                                                                                                  |                                    |                                    |                                    |                                    |
| 1) One or more peptide spectral match can represent a protein                                                                  |                                    |                                    |                                    |                                    |
| 2) Quantification channels of peptide IDs were subjected to mathematical summation to calculate and derive protein abundance.  |                                    |                                    |                                    |                                    |
